# Supplementary material
Source: PubMed Central journal article supplement (PMC7846106)
Supplement: kxz017_supplementary_data.pdf [file kxz017_supplementary_data.pdf]

## Supplementary Material

Francisco J. Rubio<sup>a\*</sup>, Bernard Rachet<sup>b</sup>, Roch Giorgi<sup>c</sup>, Camille Maringe<sup>b</sup>,  
Aurélien Belot<sup>b</sup>, and the CENSUR working survival group

<sup>a</sup> *Department of Mathematics,  
King's College London,  
London, WC2R 2LS, UK.*

<sup>b</sup> *Cancer Survival Group, Faculty of Epidemiology and Population Health,  
Department of Non-Communicable Disease Epidemiology,  
London School of Hygiene & Tropical Medicine,  
London, WC1E 7HT, UK.*

<sup>c</sup> *Aix Marseille Univ, APHM, INSERM, IRD, SESSTIM,  
Sciences Economiques & Sociales de la Santé & Traitement de l'Information Médicale,  
Hop Timone, BioSTIC, Biostatistique et Technologies de l'Information et de la Communication,  
Marseille, France.*

javier.rubio\_alvarez@kcl.ac.uk

### 1. ADDITIONAL FIGURE

Figure 1 below presents the net survival curves obtained for the whole population of men lung cancer patients obtained with models M1–M3 as well as with the non-parametric Pohar-Perme estimator (Perme *and others*, 2012). In contrast, Figure 3 in the paper presents the net survival curves associated to specific patient characteristics (age, deprivation, comorbidities, and stage). Additional details on the models and the data set can be found in Section “Application: Lung Cancer data” of the paper.

### 2. TECHNICAL DETAILS

#### *Calculation of (2.6)*

The overall survival function is obtained by integrating out  $\gamma$

$$\tilde{S}_o(t; \mathbf{x}) = \int_0^\infty S_o(t | \gamma; \mathbf{x}) dG(\gamma),$$

where  $S_o(t | \gamma; \mathbf{x}) = \exp \left\{ - \int_0^t h_o(s | \gamma; \mathbf{x}) ds \right\}$ . By using the decomposition (2.5), we can rewrite the conditional cumulative hazard as follows:

$$\tilde{H}_o(t | \gamma; \mathbf{x}) = H_E(t; \mathbf{x}) + \gamma [H_P(A + t; \mathbf{z}) - H_P(A; \mathbf{z})].$$

\*To whom correspondence should be addressed.

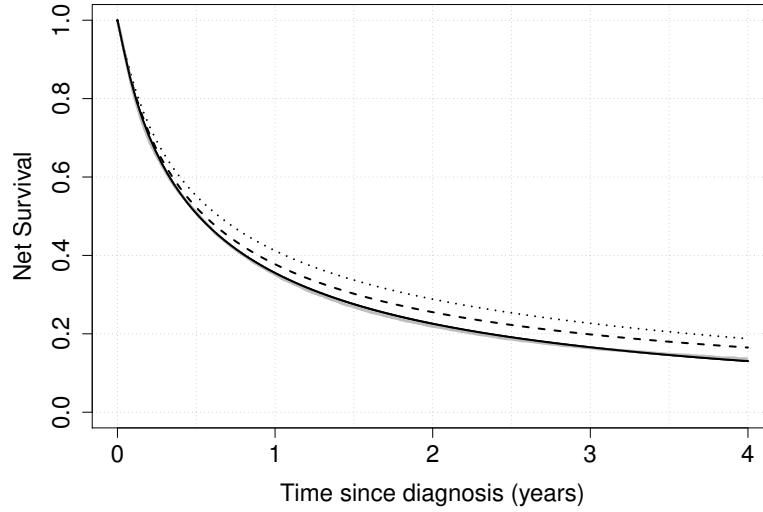

Fig. 1. Illustration for men lung cancer patients: comparison of net survival curves obtained with models M1 (continuous black line), M2 (dashed line), M3 (dotted line), as well as the non-parametric Pohar-Perme estimator (continuous grey line) for the whole population.

Consequently,

$$\begin{aligned}\tilde{S}_o(t; \mathbf{x}) &= \int_0^\infty \exp\{-\gamma [H_P(A+t; \mathbf{z}) - H_P(A; \mathbf{z})] - H_E(t; \mathbf{x})\} dG(\gamma) \\ &= \exp\{-H_E(t; \mathbf{x})\} \int_0^\infty \exp\{-\gamma [H_P(A+t; \mathbf{z}) - H_P(A; \mathbf{z})]\} dG(\gamma),\end{aligned}$$

This equation thus indicate that the overall survival can be written as the product of the net survival,  $\exp\{-H_E(t; \mathbf{x})\}$ , multiplied by the Laplace transform of the differences of the population cumulative hazard.

### 3. TRUE VALUES OF THE PARAMETERS AND CORRESPONDING NET SURVIVAL

#### *Simulation design I*

Table 1 shows the net survival (NS) associated to the different covariate values in the simulation design I.

#### *Simulation design II*

For the Simulation design II, we consider an alternative baseline hazard function given by the Weibull distribution with scale parameter  $\theta = 12$  and shape parameter  $\kappa = 0.8$ . This baseline hazard is decreasing. Moreover, when the baseline hazard is Weibull, it is known that the AFT, AH, and PH structures coincide, thus the additional parameters in the GH structure become redundant (Rubio *and others*, 2018). Thus, for

| sex | comorb. | age | NS(1) | NS(5) |
|-----|---------|-----|-------|-------|
| 0   | 0       | 60  | 0.90  | 0.51  |
| 0   | 1       | 60  | 0.87  | 0.42  |
| 1   | 0       | 60  | 0.88  | 0.44  |
| 1   | 1       | 60  | 0.85  | 0.35  |
| 0   | 0       | 70  | 0.81  | 0.34  |
| 0   | 1       | 70  | 0.76  | 0.25  |
| 1   | 0       | 70  | 0.77  | 0.27  |
| 1   | 1       | 70  | 0.72  | 0.19  |
| 0   | 0       | 80  | 0.69  | 0.22  |
| 0   | 1       | 80  | 0.63  | 0.15  |
| 1   | 0       | 80  | 0.64  | 0.16  |
| 1   | 1       | 80  | 0.56  | 0.10  |

Table 1. Simulation design I:  $(\kappa, \theta, \alpha) = (1.75, 0.6, 2.5)$ ,  $\beta_1 = (age, sex, comorbidity) = (0.1, 0.1, 0.1)$ , and  $\beta_2 = (age, sex, comorbidity) = (0.05, 0.2, 0.25)$ . Net Survival (NS) associated to the different covariate configurations at 1 and 5 years.

this scenario we only fit the PH model with a Weibull baseline hazard (we emphasise that this is not a restriction as the PH, the AH, and the AFT model coincide when we assume a Weibull baseline hazard). The fitted model now contains two parameters for the baseline hazard  $(\theta, \kappa)$  and three regression parameters  $(\beta_1, \beta_2, \beta_3)$ . The simulation of the covariates is done in the same way as described in the Simulation Studies section in the main paper. Table 2 shows the net survival (NS) associated to the different covariate values in the simulation design I. Table 18 shows the proportion of selected hazard structures using AIC for both designs.

| sex | comorb. | age | NS(1) | NS(5) |
|-----|---------|-----|-------|-------|
| 0   | 0       | 60  | 0.90  | 0.69  |
| 0   | 1       | 60  | 0.89  | 0.67  |
| 1   | 0       | 60  | 0.89  | 0.67  |
| 1   | 1       | 60  | 0.88  | 0.64  |
| 0   | 0       | 70  | 0.87  | 0.61  |
| 0   | 1       | 70  | 0.86  | 0.58  |
| 1   | 0       | 70  | 0.86  | 0.58  |
| 1   | 1       | 70  | 0.85  | 0.55  |
| 0   | 0       | 80  | 0.83  | 0.51  |
| 0   | 1       | 80  | 0.82  | 0.48  |
| 1   | 0       | 80  | 0.82  | 0.48  |
| 1   | 1       | 80  | 0.80  | 0.44  |

Table 2. Simulation design II:  $(\theta, \kappa) = (12, 0.8)$ , and  $\beta = (age, sex, comorbidity) = (0.03, 0.1, 0.1)$ . Net Survival (NS) associated to the different covariate configurations at 1 and 5 years.

## 4. SIMULATION STUDY

4.1  $n = 5000$ : *Simulation design I*

The results associated to  $n = 5000$  and design I are presented in Tables 3–5. The corresponding fitted hazards are presented in Figures 2–4.

**Design I:  $\gamma = 1$** 

| Model               | Parameter           | MMLE  | mMLE  | ESD   | Mean Std Error | RMSE  | Coverage |
|---------------------|---------------------|-------|-------|-------|----------------|-------|----------|
| M1                  | $\sigma$ (1.75)     | 1.786 | 1.806 | 0.414 | 0.421          | 0.416 | 0.948    |
|                     | $\kappa$ (0.6)      | 0.606 | 0.607 | 0.065 | 0.066          | 0.065 | 0.946    |
|                     | $\alpha$ (2.5)      | 2.529 | 2.440 | 0.469 | 0.458          | 0.470 | 0.954    |
|                     | $\beta_{11}$ (0.1)  | 0.102 | 0.102 | 0.015 | 0.014          | 0.015 | 0.957    |
|                     | $\beta_{12}$ (0.1)  | 0.083 | 0.089 | 0.256 | 0.239          | 0.256 | 0.948    |
|                     | $\beta_{13}$ (0.1)  | 0.082 | 0.085 | 0.239 | 0.238          | 0.240 | 0.957    |
|                     | $\beta_{21}$ (0.05) | 0.050 | 0.050 | 0.003 | 0.003          | 0.003 | 0.949    |
|                     | $\beta_{22}$ (0.2)  | 0.200 | 0.198 | 0.042 | 0.042          | 0.042 | 0.955    |
| $\beta_{23}$ (0.25) | 0.250               | 0.249 | 0.045 | 0.042 | 0.045          | 0.934 |          |
| M2                  | $\sigma$ (1.75)     | 1.649 | 1.675 | 0.512 | 0.526          | 0.521 | 0.948    |
|                     | $\kappa$ (0.6)      | 0.589 | 0.587 | 0.099 | 0.102          | 0.100 | 0.916    |
|                     | $\alpha$ (2.5)      | 2.802 | 2.595 | 0.964 | 0.898          | 1.010 | 0.926    |
|                     | $\beta_{11}$ (0.1)  | 0.101 | 0.101 | 0.014 | 0.014          | 0.014 | 0.951    |
|                     | $\beta_{12}$ (0.1)  | 0.107 | 0.116 | 0.244 | 0.234          | 0.244 | 0.945    |
|                     | $\beta_{13}$ (0.1)  | 0.085 | 0.089 | 0.235 | 0.241          | 0.235 | 0.964    |
|                     | $\beta_{21}$ (0.05) | 0.049 | 0.049 | 0.005 | 0.005          | 0.005 | 0.935    |
|                     | $\beta_{22}$ (0.2)  | 0.195 | 0.200 | 0.057 | 0.058          | 0.057 | 0.950    |
|                     | $\beta_{23}$ (0.25) | 0.255 | 0.251 | 0.055 | 0.053          | 0.055 | 0.935    |
| $\gamma$ (1)        | 1.027               | 1.025 | 0.664 | 0.661 | 0.664          | 0.876 |          |
| M3                  | $\sigma$ (1.75)     | 1.601 | 1.601 | 0.558 | 0.607          | 0.577 | 0.970    |
|                     | $\kappa$ (0.6)      | 0.566 | 0.562 | 0.101 | 0.111          | 0.107 | 0.951    |
|                     | $\alpha$ (2.5)      | 3.029 | 2.774 | 1.118 | 1.110          | 1.236 | 0.966    |
|                     | $\beta_{11}$ (0.1)  | 0.101 | 0.100 | 0.015 | 0.015          | 0.015 | 0.958    |
|                     | $\beta_{12}$ (0.1)  | 0.080 | 0.091 | 0.251 | 0.252          | 0.252 | 0.953    |
|                     | $\beta_{13}$ (0.1)  | 0.086 | 0.094 | 0.248 | 0.253          | 0.248 | 0.958    |
|                     | $\beta_{21}$ (0.05) | 0.047 | 0.047 | 0.006 | 0.006          | 0.007 | 0.955    |
|                     | $\beta_{22}$ (0.2)  | 0.178 | 0.183 | 0.063 | 0.067          | 0.067 | 0.972    |
|                     | $\beta_{23}$ (0.25) | 0.272 | 0.269 | 0.061 | 0.062          | 0.064 | 0.952    |
|                     | $b$ (0)             | 0.632 | 0.100 | 1.004 | 4.925          | 1.186 | –        |
| $\mu$ (1)           | 1.482               | 1.448 | 0.791 | 0.874 | 0.926          | 0.788 |          |
| M4                  | $\sigma$ (1.75)     | 1.655 | 1.711 | 0.497 | 0.459          | 0.506 | 0.961    |
|                     | $\kappa$ (0.6)      | 0.584 | 0.591 | 0.088 | 0.075          | 0.089 | 0.922    |
|                     | $\alpha$ (2.5)      | 2.831 | 2.587 | 0.978 | 0.717          | 1.032 | 0.942    |
|                     | $\beta_{11}$ (0.1)  | 0.100 | 0.100 | 0.016 | 0.014          | 0.016 | 0.935    |
|                     | $\beta_{12}$ (0.1)  | 0.086 | 0.093 | 0.253 | 0.235          | 0.253 | 0.941    |
|                     | $\beta_{13}$ (0.1)  | 0.091 | 0.090 | 0.240 | 0.235          | 0.240 | 0.948    |
|                     | $\beta_{21}$ (0.05) | 0.049 | 0.049 | 0.005 | 0.004          | 0.005 | 0.921    |
|                     | $\beta_{22}$ (0.2)  | 0.193 | 0.197 | 0.055 | 0.048          | 0.055 | 0.944    |
|                     | $\beta_{23}$ (0.25) | 0.258 | 0.253 | 0.054 | 0.047          | 0.055 | 0.914    |
|                     | $c$ (1)             | 1.234 | 1.000 | 0.739 | –              | 0.775 | –        |

Table 3. Simulation results for the scenario GH with  $(\sigma, \kappa, \alpha) = (1.75, 0.6, 2.5)$ ,  $\beta_1 = (0.1, 0.1, 0.1)$ ,  $\beta_2 = (0.05, 0.2, 0.25)$ ,  $n = 5000$ , and no mismatch  $\gamma = 1$ . Mean of the MLEs (MMLE), median of the MLEs (mMLE), empirical standard deviation (ESD), mean (estimated) standard error, root-mean-square error (RMSE), and coverage proportions (Coverage).

Design I:  $\gamma = 1$

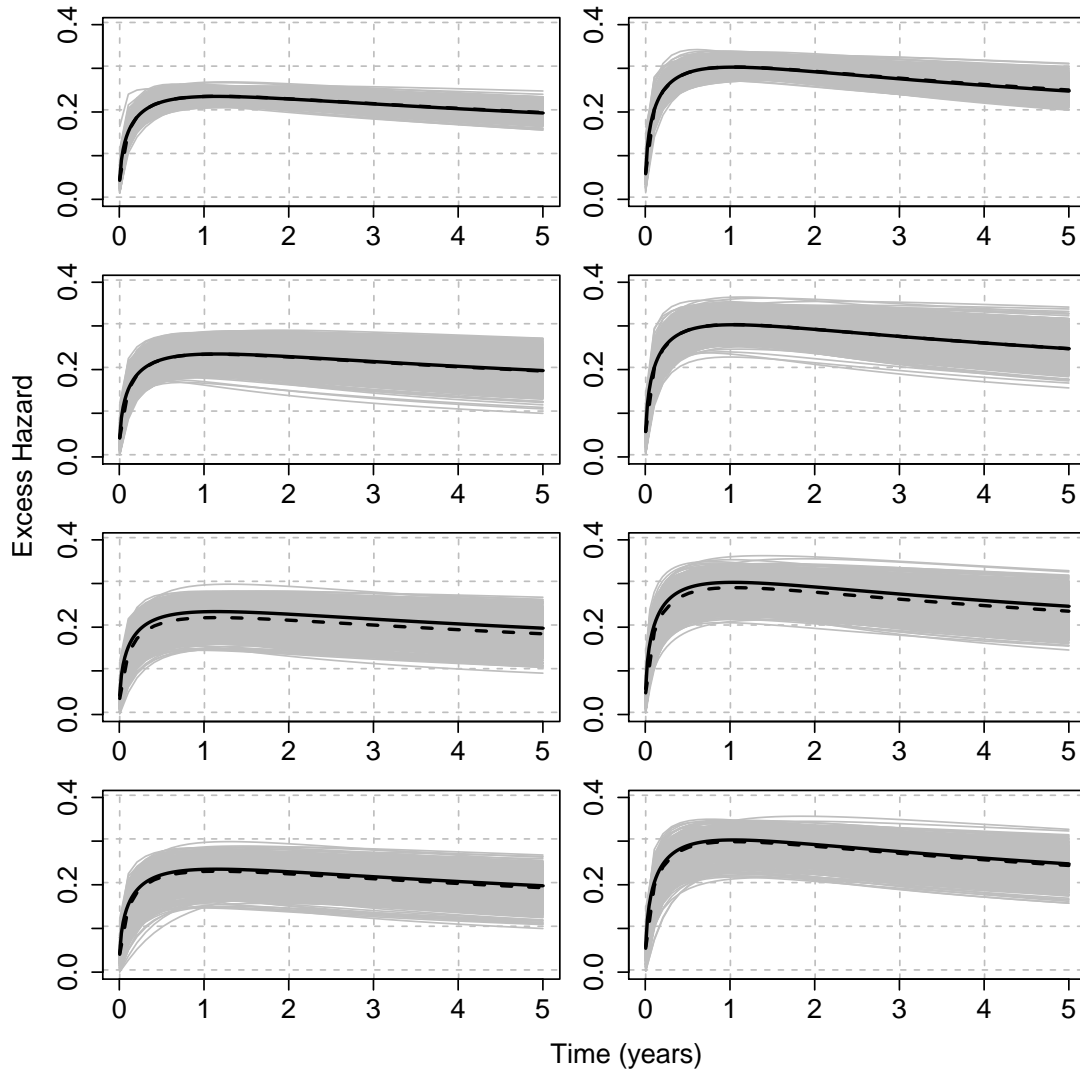

Fig. 2. Scenario with no mismatch  $\gamma = 1$ . Models M1–M4 from top to bottom. Mean of the fitted hazards (dashed lines), compared to the true generating hazard (continuous lines), and 1000 sample-specific fitted hazards (grey lines) for  $n = 5000$  and 30% censoring. Panels from left to right correspond to covariate values (age, sex, comorbidity)=(70, 0, 0), (70, 0, 1), respectively.

**Design I:**  $\gamma \sim Ga(1.2, 0.02)$

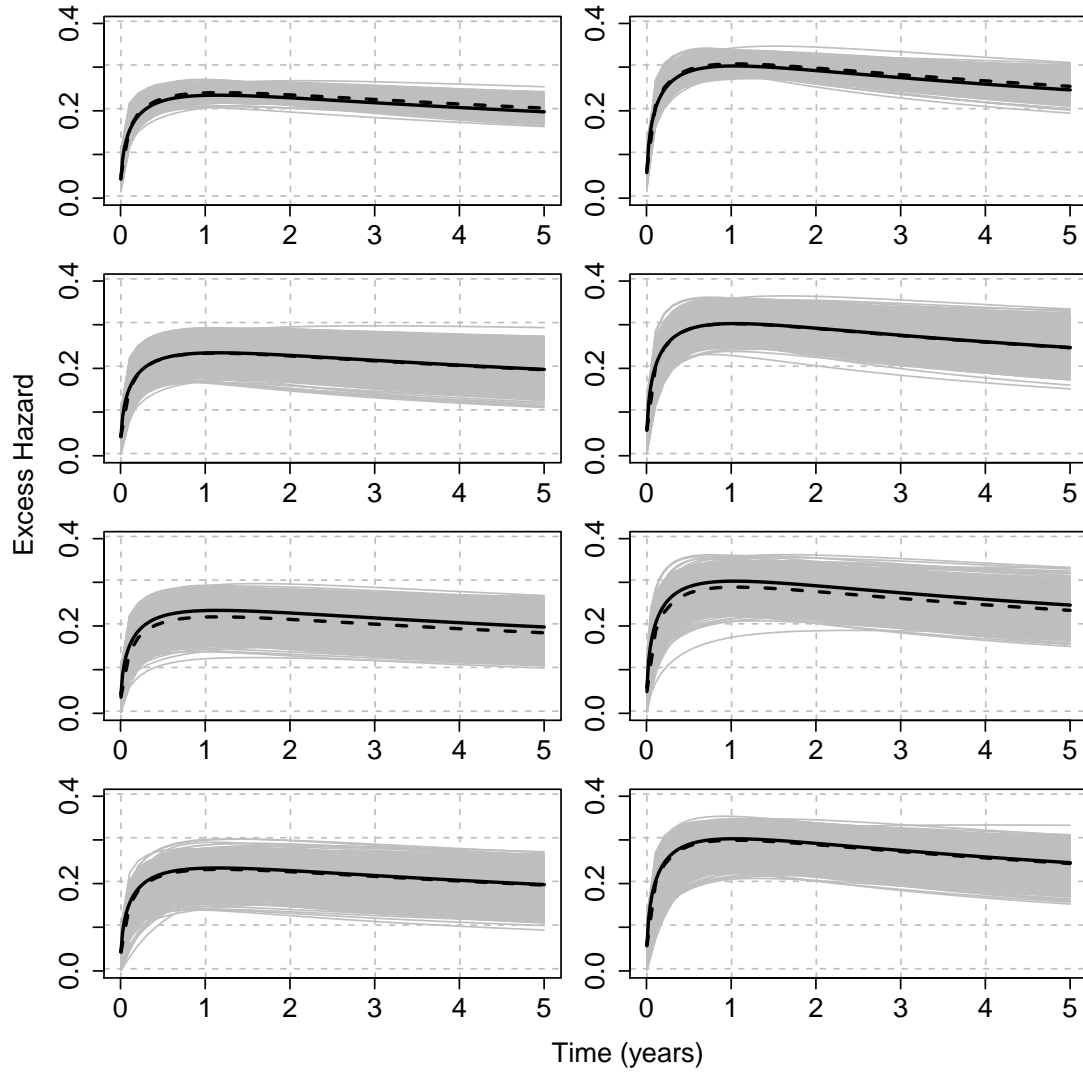

Fig. 3. Scenario with moderate mismatch  $\gamma \sim Ga(1.2, 0.02)$ . Models M1–M4 from top to bottom. Mean of the fitted hazards (dashed lines), compared to the true generating hazard (continuous lines), and 1000 sample-specific fitted hazards (grey lines) for  $n = 5000$  and 30% censoring. Panels from left to right correspond to covariate values (age, sex, comorbidity) = (70, 0, 0), (70, 0, 1), respectively.

**Design I:**  $\gamma \sim Ga(1.875, 0.075)$

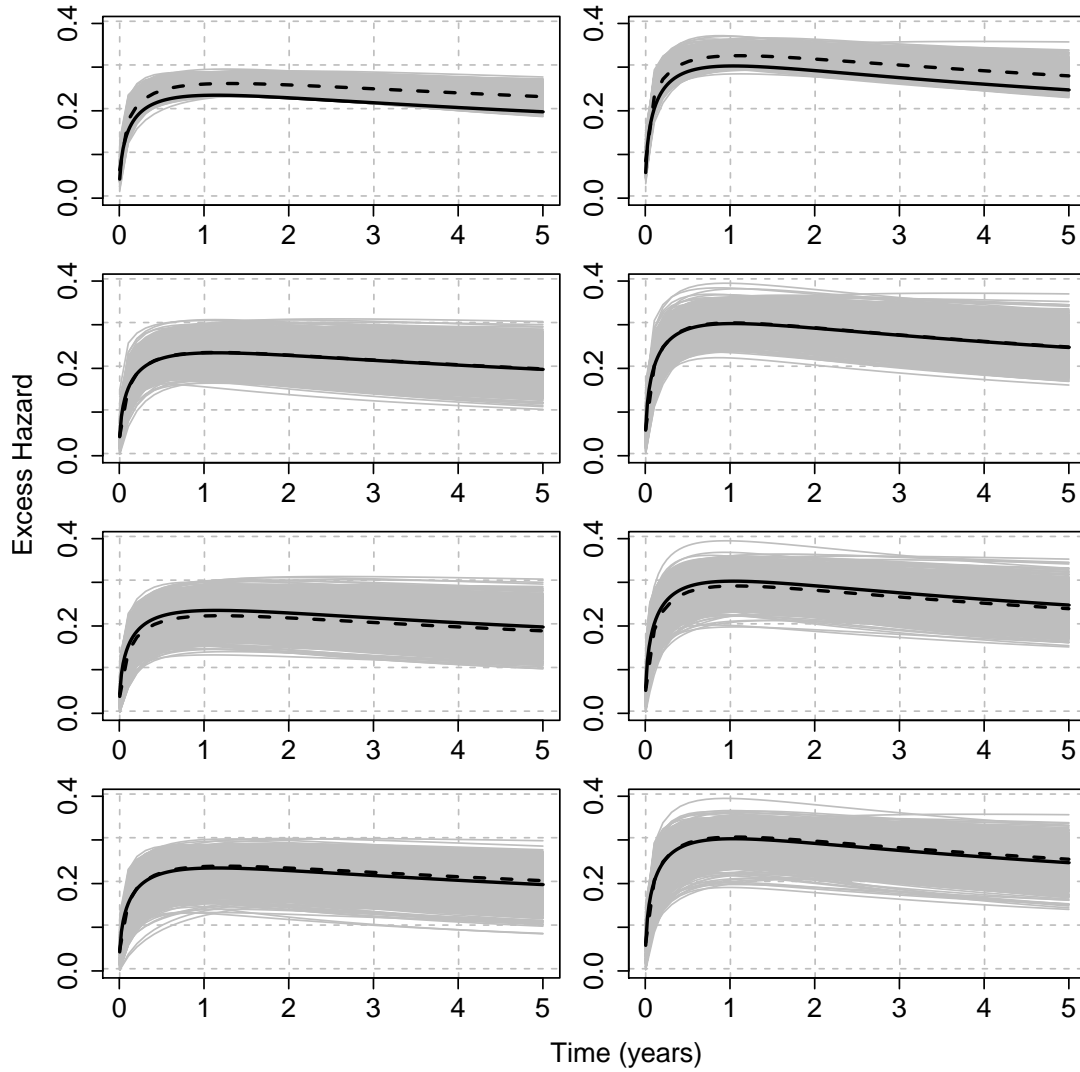

Fig. 4. Scenario with severe mismatch  $\gamma \sim Ga(1.875, 0.075)$ . Models M1–M4 from top to bottom. Mean of the fitted hazards (dashed lines), compared to the true generating hazard (continuous lines), and 1000 sample-specific fitted hazards (grey lines) for  $n = 5000$  and 30% censoring. Panels from left to right correspond to covariate values (age, sex, comorbidity)=(70, 0, 0), (70, 0, 1), respectively.

**Design I:**  $\gamma \sim Ga(1.2, 0.02)$ 

| Model | Parameter           | MMLE  | mMLE  | ESD   | Mean Std Error | RMSE  | Coverage |
|-------|---------------------|-------|-------|-------|----------------|-------|----------|
| M1    | $\sigma$ (1.75)     | 1.860 | 1.860 | 0.406 | 0.409          | 0.421 | 0.930    |
|       | $\kappa$ (0.6)      | 0.626 | 0.626 | 0.066 | 0.066          | 0.071 | 0.925    |
|       | $\alpha$ (2.5)      | 2.399 | 2.341 | 0.433 | 0.417          | 0.444 | 0.931    |
|       | $\beta_{11}$ (0.1)  | 0.101 | 0.099 | 0.015 | 0.015          | 0.015 | 0.955    |
|       | $\beta_{12}$ (0.1)  | 0.083 | 0.080 | 0.254 | 0.247          | 0.254 | 0.958    |
|       | $\beta_{13}$ (0.1)  | 0.107 | 0.108 | 0.250 | 0.246          | 0.250 | 0.951    |
|       | $\beta_{21}$ (0.05) | 0.051 | 0.051 | 0.003 | 0.003          | 0.003 | 0.922    |
|       | $\beta_{22}$ (0.2)  | 0.211 | 0.213 | 0.043 | 0.042          | 0.044 | 0.943    |
| M2    | $\beta_{23}$ (0.25) | 0.241 | 0.242 | 0.042 | 0.042          | 0.043 | 0.950    |
|       | $\sigma$ (1.75)     | 1.656 | 1.704 | 0.541 | 0.535          | 0.549 | 0.934    |
|       | $\kappa$ (0.6)      | 0.590 | 0.591 | 0.107 | 0.105          | 0.107 | 0.916    |
|       | $\alpha$ (2.5)      | 2.818 | 2.578 | 1.034 | 0.940          | 1.081 | 0.928    |
|       | $\beta_{11}$ (0.1)  | 0.101 | 0.100 | 0.015 | 0.014          | 0.015 | 0.956    |
|       | $\beta_{12}$ (0.1)  | 0.108 | 0.112 | 0.239 | 0.241          | 0.239 | 0.960    |
|       | $\beta_{13}$ (0.1)  | 0.097 | 0.099 | 0.250 | 0.249          | 0.250 | 0.948    |
|       | $\beta_{21}$ (0.05) | 0.049 | 0.050 | 0.005 | 0.005          | 0.005 | 0.924    |
| M3    | $\beta_{22}$ (0.2)  | 0.196 | 0.201 | 0.058 | 0.060          | 0.058 | 0.954    |
|       | $\beta_{23}$ (0.25) | 0.254 | 0.250 | 0.055 | 0.055          | 0.056 | 0.942    |
|       | $\gamma$ (1.2)      | 1.218 | 1.254 | 0.736 | 0.706          | 0.736 | 0.883    |
|       | $\sigma$ (1.75)     | 1.609 | 1.637 | 0.591 | 0.628          | 0.607 | 0.957    |
|       | $\kappa$ (0.6)      | 0.567 | 0.568 | 0.108 | 0.116          | 0.113 | 0.958    |
|       | $\alpha$ (2.5)      | 3.061 | 2.755 | 1.211 | 1.181          | 1.334 | 0.970    |
|       | $\beta_{11}$ (0.1)  | 0.100 | 0.099 | 0.016 | 0.016          | 0.016 | 0.945    |
|       | $\beta_{12}$ (0.1)  | 0.079 | 0.076 | 0.261 | 0.262          | 0.262 | 0.959    |
| M4    | $\beta_{13}$ (0.1)  | 0.088 | 0.092 | 0.253 | 0.260          | 0.253 | 0.957    |
|       | $\beta_{21}$ (0.05) | 0.046 | 0.047 | 0.007 | 0.007          | 0.008 | 0.957    |
|       | $\beta_{22}$ (0.2)  | 0.176 | 0.183 | 0.066 | 0.070          | 0.070 | 0.961    |
|       | $\beta_{23}$ (0.25) | 0.271 | 0.266 | 0.062 | 0.064          | 0.066 | 0.952    |
|       | $b$ (0.02)          | 0.613 | 0.254 | 0.906 | 1.443          | 1.083 | 0.678    |
|       | $\mu$ (1.2)         | 1.711 | 1.718 | 0.856 | 0.930          | 0.997 | 0.774    |
|       | $\sigma$ (1.75)     | 1.710 | 1.759 | 0.542 | 0.469          | 0.543 | 0.950    |
|       | $\kappa$ (0.6)      | 0.596 | 0.609 | 0.098 | 0.077          | 0.098 | 0.921    |
| M4    | $\alpha$ (2.5)      | 2.785 | 2.458 | 1.125 | 0.749          | 1.160 | 0.939    |
|       | $\beta_{11}$ (0.1)  | 0.100 | 0.099 | 0.017 | 0.015          | 0.017 | 0.943    |
|       | $\beta_{12}$ (0.1)  | 0.089 | 0.085 | 0.255 | 0.246          | 0.255 | 0.953    |
|       | $\beta_{13}$ (0.1)  | 0.113 | 0.106 | 0.260 | 0.247          | 0.260 | 0.951    |
|       | $\beta_{21}$ (0.05) | 0.049 | 0.050 | 0.006 | 0.004          | 0.006 | 0.902    |
|       | $\beta_{22}$ (0.2)  | 0.197 | 0.203 | 0.059 | 0.049          | 0.059 | 0.936    |
|       | $\beta_{23}$ (0.25) | 0.253 | 0.248 | 0.058 | 0.048          | 0.058 | 0.937    |
|       | $c$ (1.2)           | 1.348 | 1.000 | 0.817 | –              | 0.830 | –        |

Table 4. Simulation results for the scenario GH with  $(\sigma, \kappa, \alpha) = (1.75, 0.6, 2.5)$ ,  $\beta_1 = (0.1, 0.1, 0.1)$ ,  $\beta_2 = (0.05, 0.2, 0.25)$ ,  $n = 5000$ , and moderate mismatch  $\gamma \sim Ga(1.2, 0.02)$ . Mean of the MLEs (MMLE), median of the MLEs (mMLE), empirical standard deviation (ESD), mean (estimated) standard error, root-mean-square error (RMSE), and coverage proportions (Coverage).

4.2  $n = 10000$ : *Simulation design I*

The results associated to  $n = 10000$  and design I are presented in Tables 6–9. The corresponding fitted hazards are presented in Figures 5–8.

4.3  $n = 5000$ : *Simulation design II*

The results associated to  $n = 5000$  and design II are presented in Tables 10–13. The corresponding fitted hazards are presented in Figures 9–12.



Design I:  $\gamma = 1$

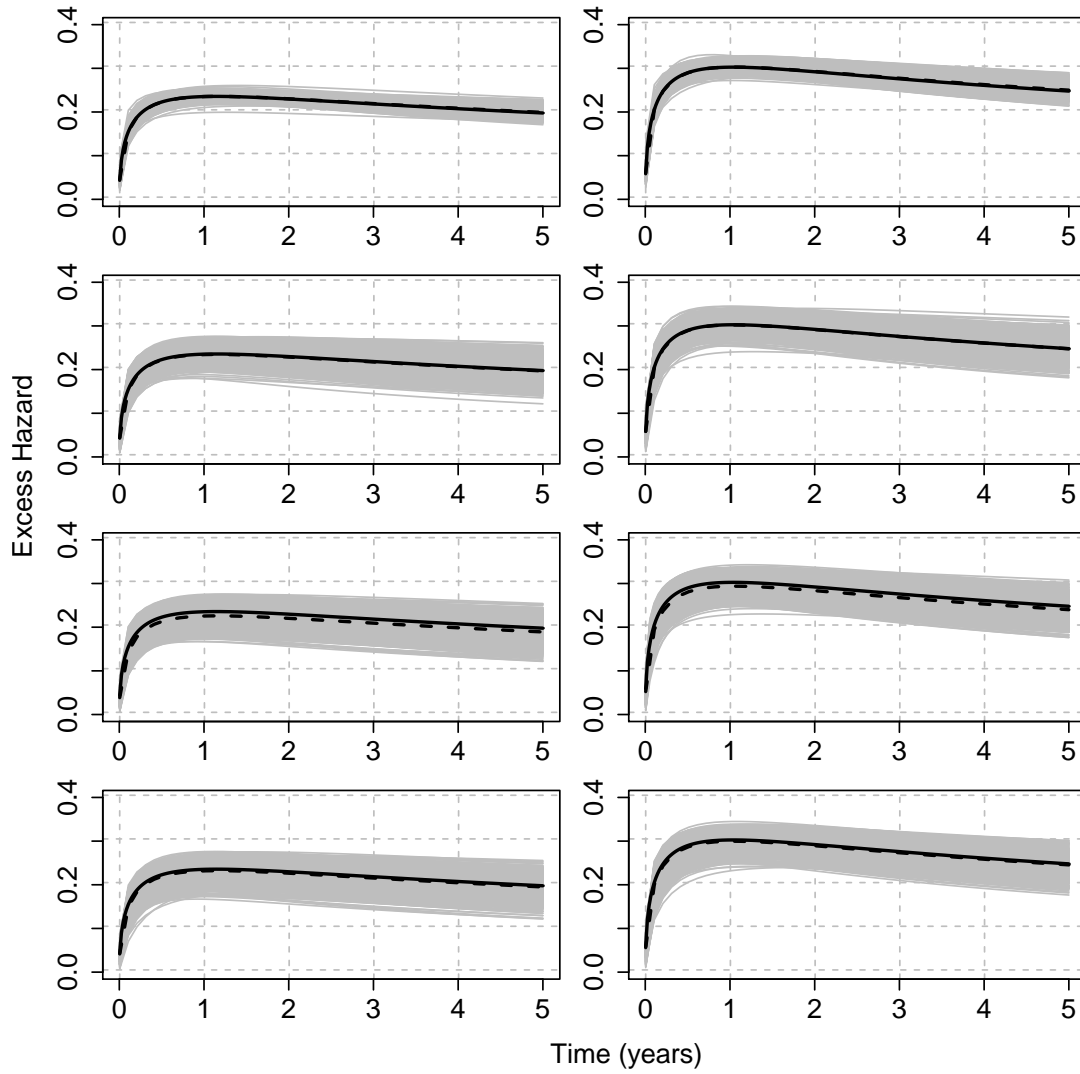

Fig. 5. Scenario with no mismatch  $\gamma = 1$ . Models M1–M4 from top to bottom. Mean of the fitted hazards (dashed lines), compared to the true generating hazard (continuous lines), and 1000 sample-specific fitted hazards (grey lines) for  $n = 10000$  and 30% censoring. Panels from left to right correspond to covariate values (age, sex, comorbidity)=(70, 0, 0), (70, 0, 1), respectively.

**Design I:**  $\gamma \sim Ga(1.2, 0.02)$

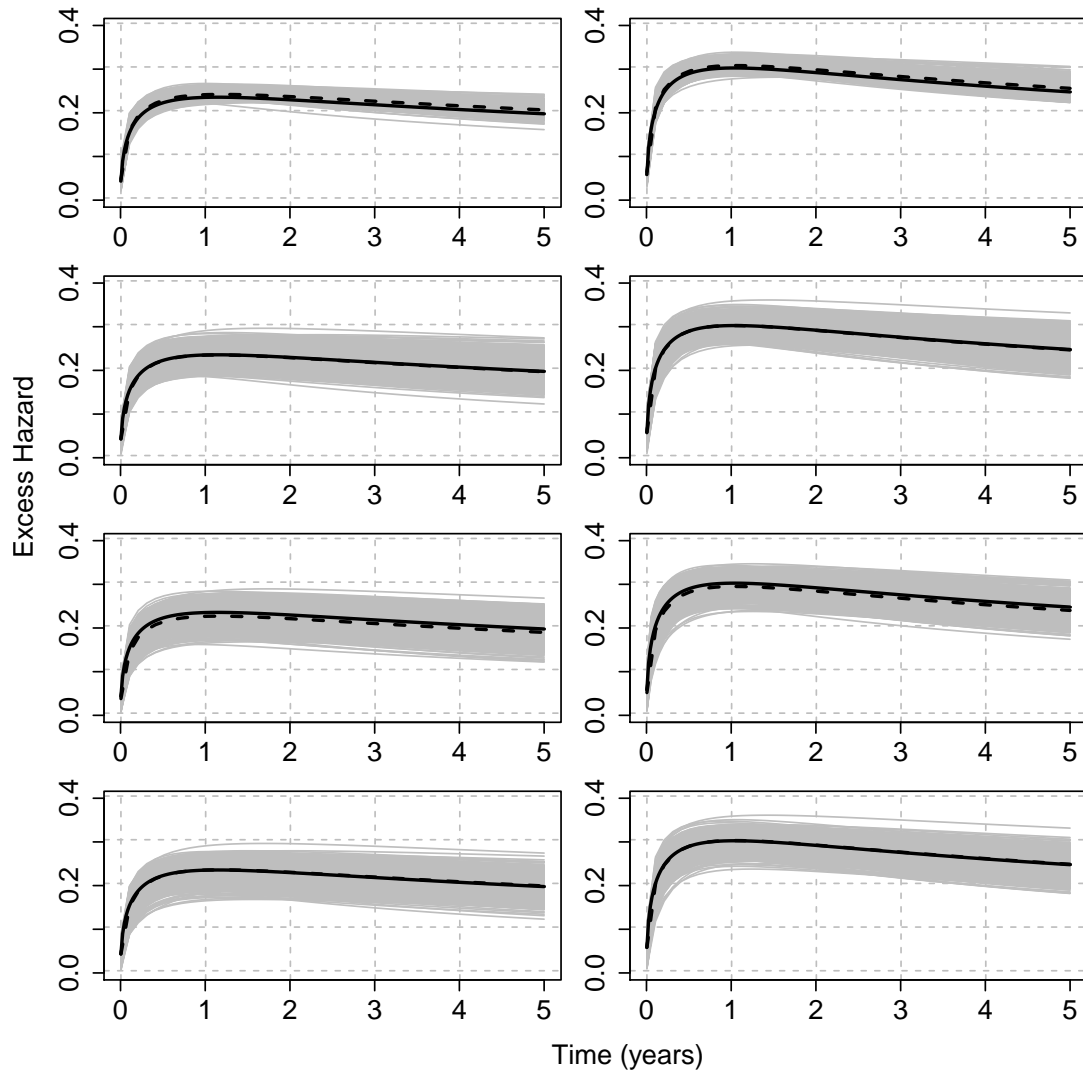

Fig. 6. Scenario with moderate mismatch  $\gamma \sim Ga(1.2, 0.02)$ . Models M1–M4 from top to bottom. Mean of the fitted hazards (dashed lines), compared to the true generating hazard (continuous lines), and 1000 sample-specific fitted hazards (grey lines) for  $n = 10000$  and 30% censoring. Panels from left to right correspond to covariate values (age, sex, comorbidity)=(70, 0, 0), (70, 0, 1), respectively.

**Design I:**  $\gamma \sim Ga(1.875, 0.075)$

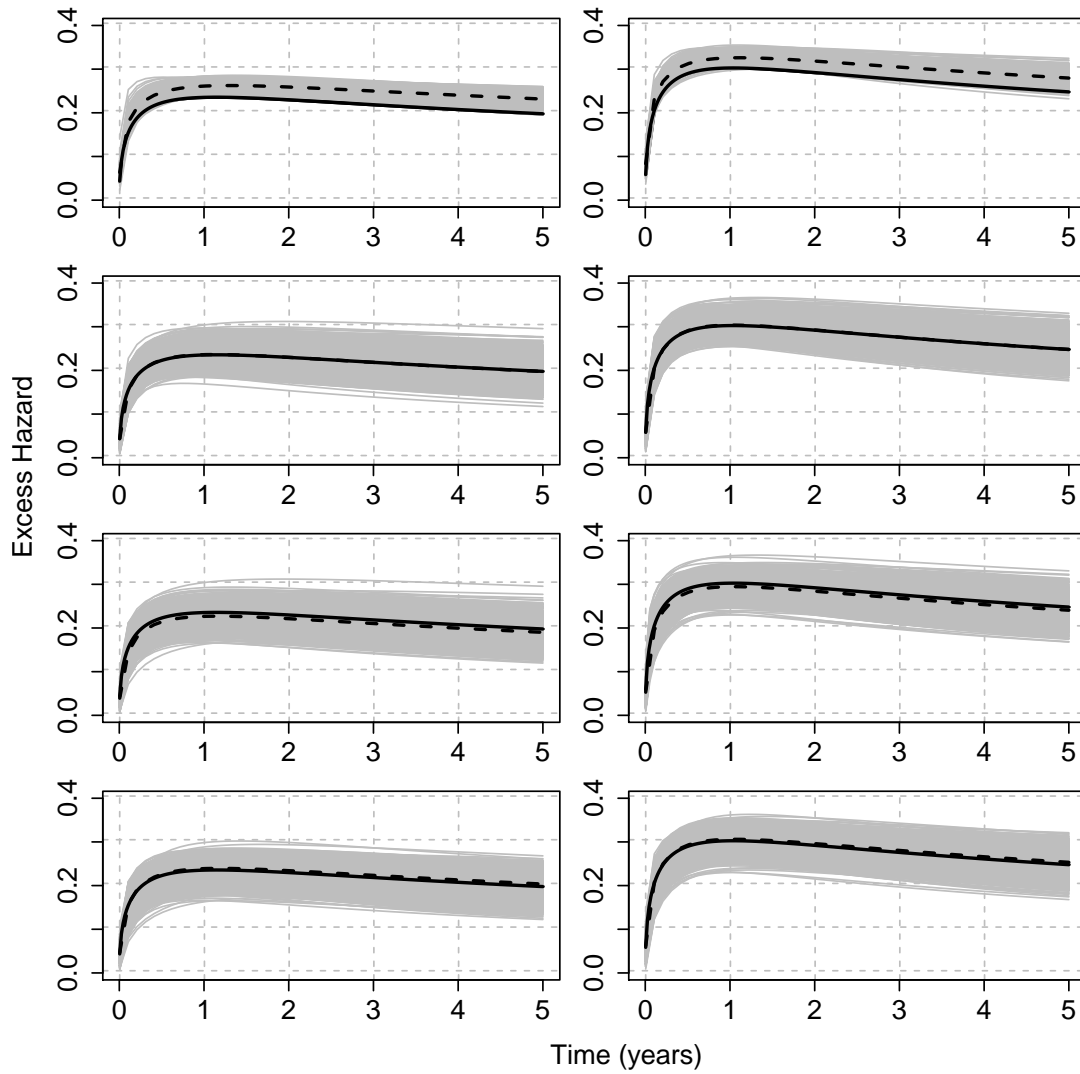

Fig. 7. Scenario with severe mismatch  $\gamma \sim Ga(1.875, 0.075)$ . Models M1–M4 from top to bottom. Mean of the fitted hazards (dashed lines), compared to the true generating hazard (continuous lines), and 1000 sample-specific fitted hazards (grey lines) for  $n = 10000$  and 30% censoring. Panels from left to right correspond to covariate values (age, sex, comorbidity)=(70, 0, 0), (70, 0, 1), respectively.

**Design I:**  $\gamma \sim Ga(6.5, 10)$

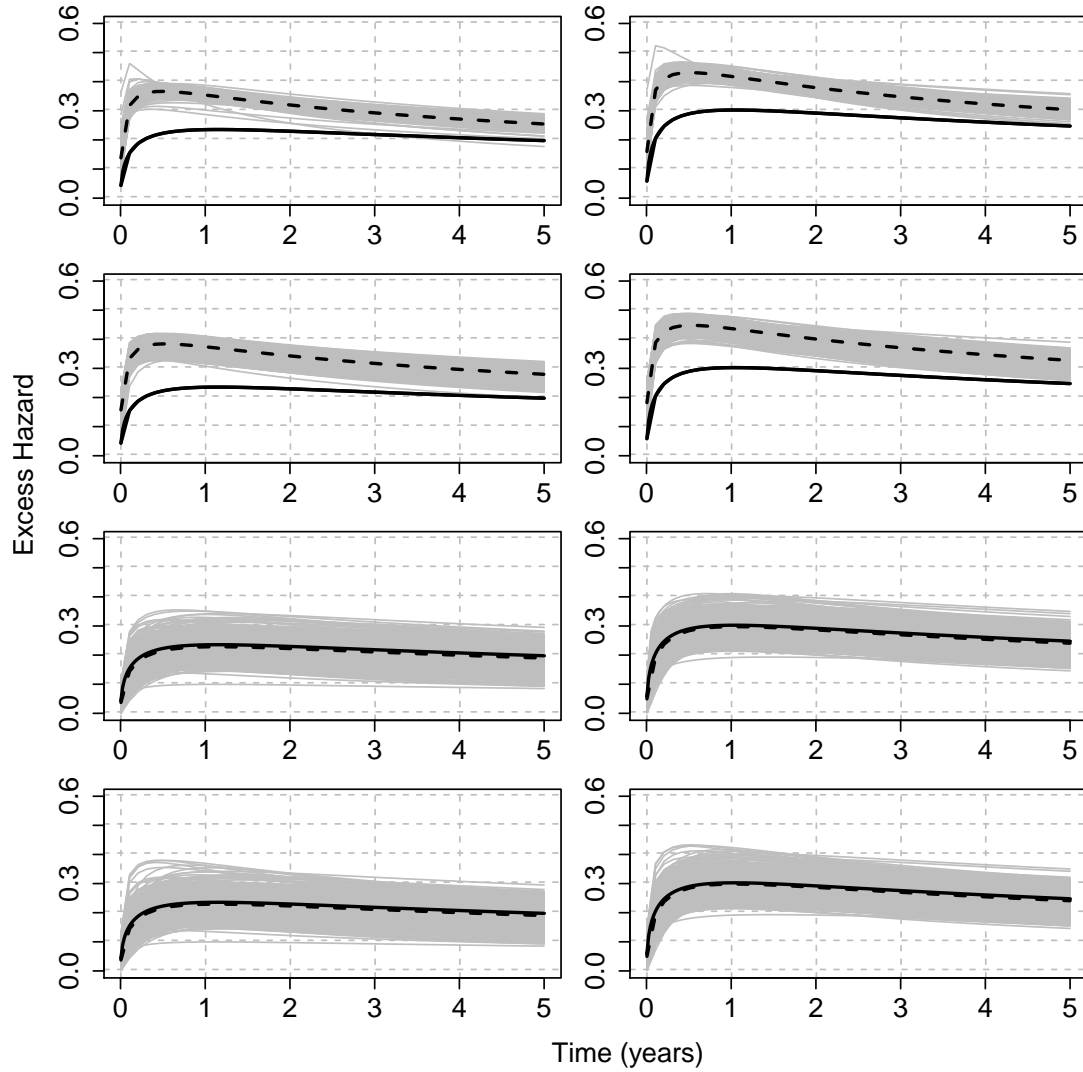

Fig. 8. Scenario with wide mismatch  $\gamma \sim Ga(6.5, 10)$ . Models M1–M4 from top to bottom. Mean of the fitted hazards (dashed lines), compared to the true generating hazard (continuous lines), and 1000 sample-specific fitted hazards (grey lines) for  $n = 10000$  and 30% censoring. Panels from left to right correspond to covariate values (age, sex, comorbidity)=(70, 0, 0), (70, 0, 1), respectively.

Design II:  $\gamma = 1$

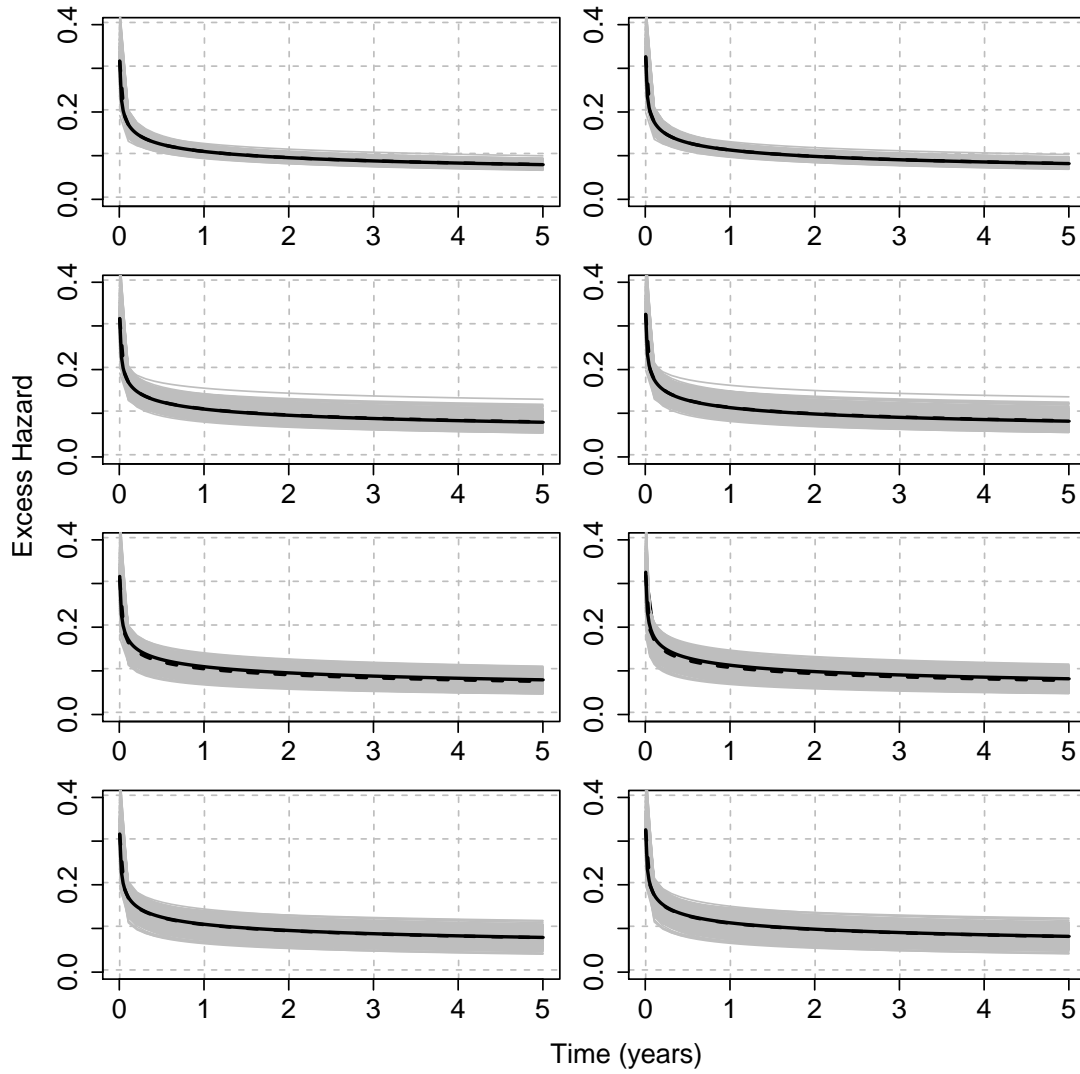

Fig. 9. Scenario with no mismatch  $\gamma = 1$ . Models M1–M4 from top to bottom. Mean of the fitted hazards (dashed lines), compared to the true generating hazard (continuous lines), and 1000 sample-specific fitted hazards (grey lines) for  $n = 5000$  and 45% censoring. Panels from left to right correspond to covariate values (age, sex, comorbidity)=(70, 0, 0), (70, 0, 1), respectively.

**Design II:**  $\gamma \sim Ga(1.2, 0.02)$

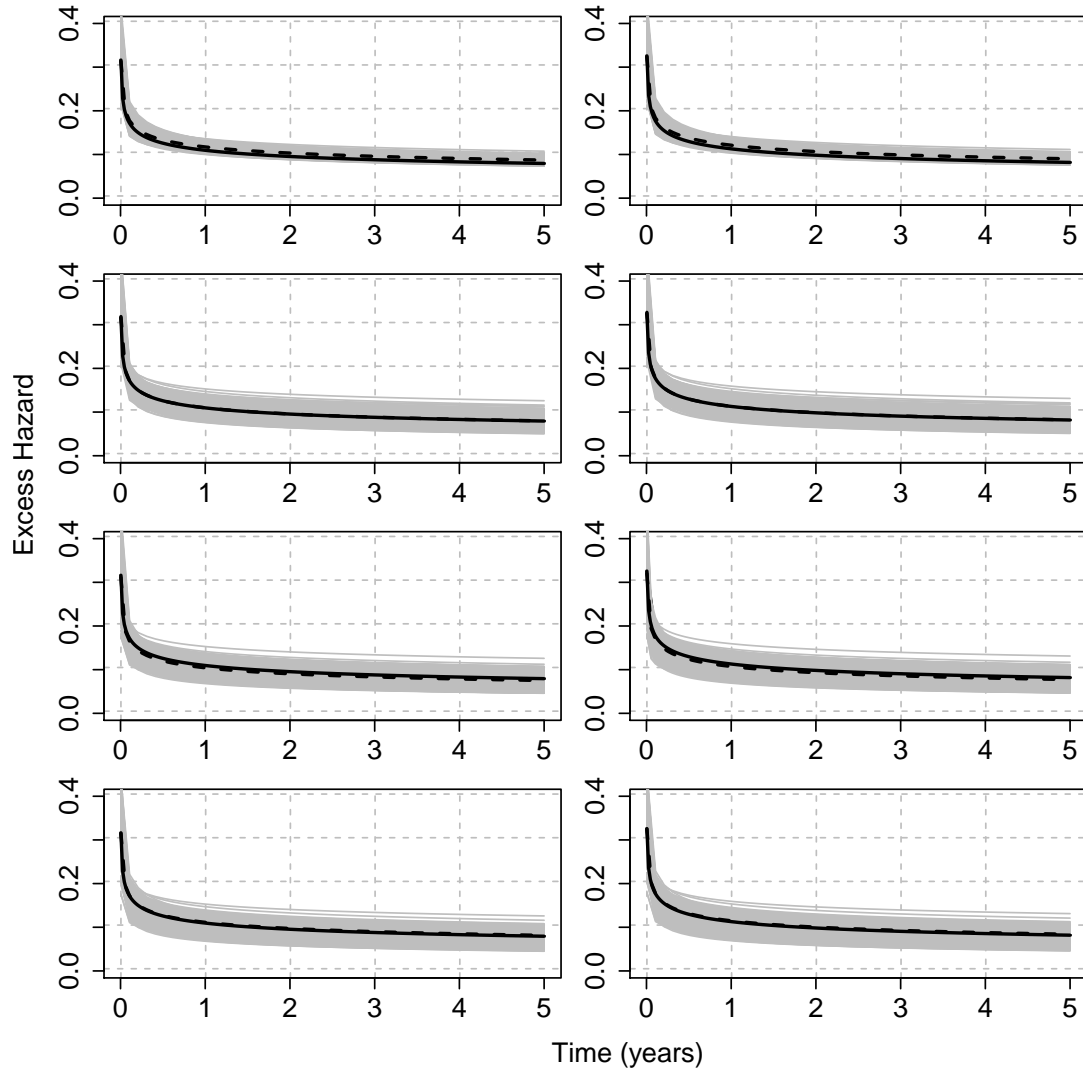

Fig. 10. Scenario with moderate mismatch  $\gamma \sim Ga(1.2, 0.02)$ . Models M1–M4 from top to bottom. Mean of the fitted hazards (dashed lines), compared to the true generating hazard (continuous lines), and 1000 sample-specific fitted hazards (grey lines) for  $n = 5000$  and 45% censoring. Panels from left to right correspond to covariate values (age, sex, comorbidity)=(70, 0, 0), (70, 0, 1), respectively.

**Design II:**  $\gamma \sim Ga(1.875, 0.075)$

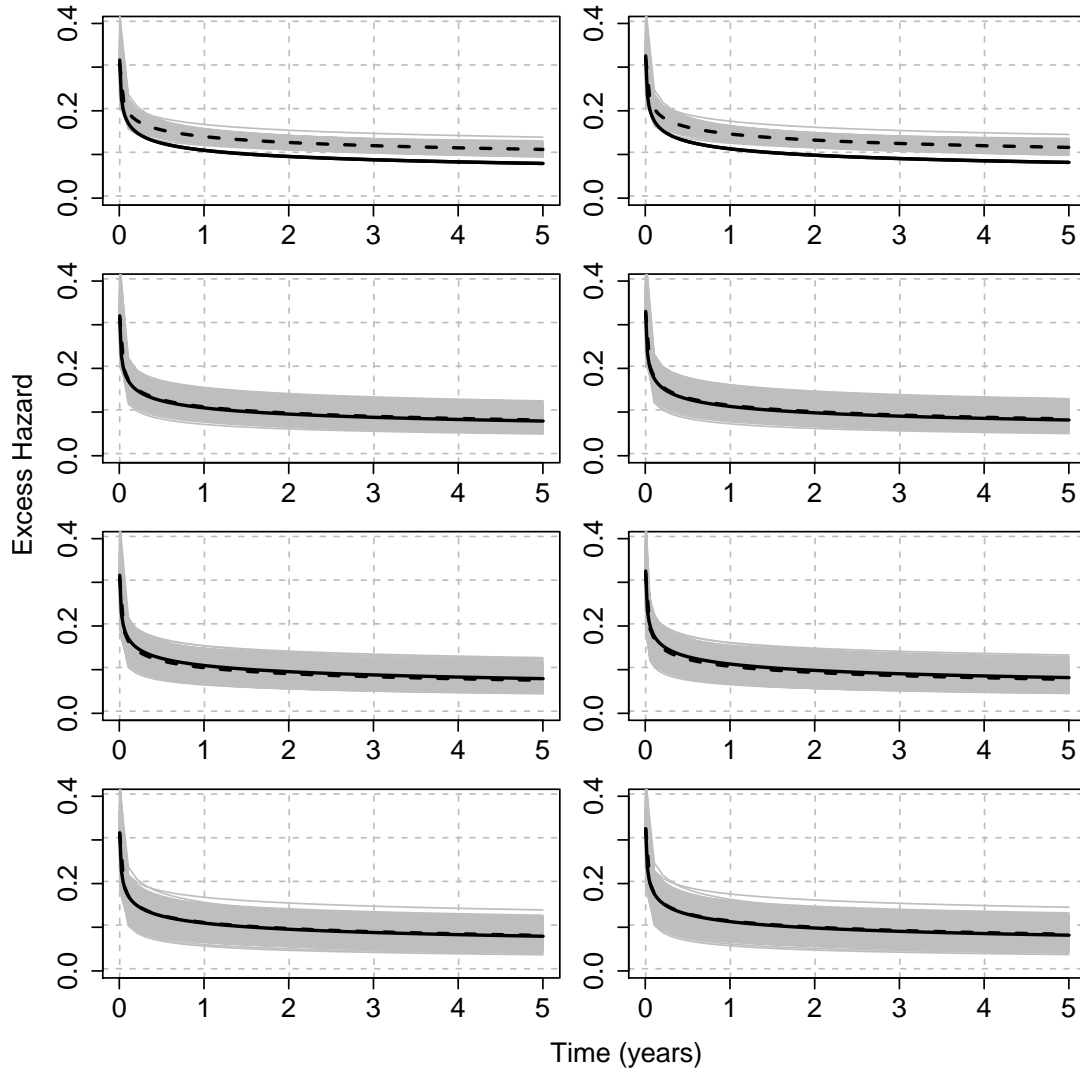

Fig. 11. Scenario with severe mismatch  $\gamma \sim Ga(1.875, 0.075)$ . Models M1–M4 from top to bottom. Mean of the fitted hazards (dashed lines), compared to the true generating hazard (continuous lines), and 1000 sample-specific fitted hazards (grey lines) for  $n = 5000$  and 45% censoring. Panels from left to right correspond to covariate values (age, sex, comorbidity)=(70, 0, 0), (70, 0, 1), respectively.

**Design II:**  $\gamma \sim Ga(6.5, 10)$

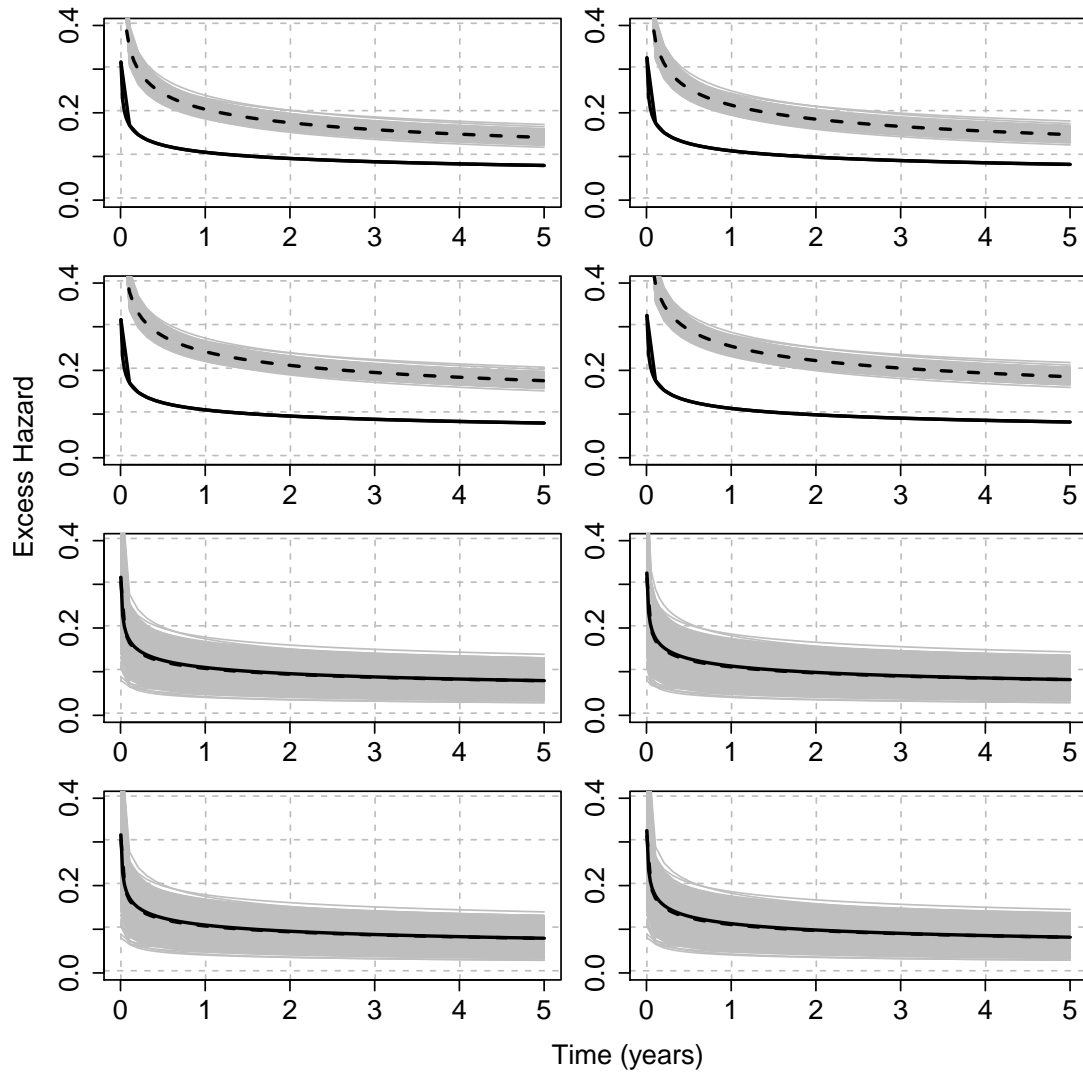

Fig. 12. Scenario with wide mismatch  $\gamma \sim Ga(6.5, 10)$ . Models M1–M4 from top to bottom. Mean of the fitted hazards (dashed lines), compared to the true generating hazard (continuous lines), and 1000 sample-specific fitted hazards (grey lines) for  $n = 5000$  and 45% censoring. Panels from left to right correspond to covariate values (age, sex, comorbidity)=(70, 0, 0), (70, 0, 1), respectively.



**Design I:**  $\gamma \sim Ga(1.875, 0.075)$

| Model | Parameter           | MMLE  | mMLE  | ESD   | Mean Std Error | RMSE  | Coverage |
|-------|---------------------|-------|-------|-------|----------------|-------|----------|
| M1    | $\sigma$ (1.75)     | 2.039 | 2.045 | 0.368 | 0.370          | 0.468 | 0.825    |
|       | $\kappa$ (0.6)      | 0.688 | 0.686 | 0.067 | 0.067          | 0.111 | 0.687    |
|       | $\alpha$ (2.5)      | 2.064 | 2.026 | 0.320 | 0.318          | 0.541 | 0.697    |
|       | $\beta_{11}$ (0.1)  | 0.102 | 0.101 | 0.016 | 0.016          | 0.016 | 0.962    |
|       | $\beta_{12}$ (0.1)  | 0.079 | 0.092 | 0.278 | 0.275          | 0.279 | 0.952    |
|       | $\beta_{13}$ (0.1)  | 0.170 | 0.174 | 0.281 | 0.275          | 0.290 | 0.958    |
|       | $\beta_{21}$ (0.05) | 0.054 | 0.054 | 0.003 | 0.003          | 0.005 | 0.701    |
|       | $\beta_{22}$ (0.2)  | 0.241 | 0.240 | 0.040 | 0.040          | 0.057 | 0.832    |
|       | $\beta_{23}$ (0.25) | 0.216 | 0.216 | 0.040 | 0.040          | 0.053 | 0.859    |
| M2    | $\sigma$ (1.75)     | 1.657 | 1.674 | 0.564 | 0.567          | 0.571 | 0.915    |
|       | $\kappa$ (0.6)      | 0.594 | 0.589 | 0.113 | 0.115          | 0.113 | 0.938    |
|       | $\alpha$ (2.5)      | 2.810 | 2.578 | 1.008 | 1.014          | 1.054 | 0.940    |
|       | $\beta_{11}$ (0.1)  | 0.102 | 0.101 | 0.016 | 0.016          | 0.016 | 0.954    |
|       | $\beta_{12}$ (0.1)  | 0.115 | 0.124 | 0.263 | 0.263          | 0.264 | 0.957    |
|       | $\beta_{13}$ (0.1)  | 0.110 | 0.114 | 0.276 | 0.272          | 0.276 | 0.959    |
|       | $\beta_{21}$ (0.05) | 0.049 | 0.050 | 0.006 | 0.006          | 0.006 | 0.946    |
|       | $\beta_{22}$ (0.2)  | 0.195 | 0.201 | 0.067 | 0.066          | 0.067 | 0.933    |
|       | $\beta_{23}$ (0.25) | 0.253 | 0.253 | 0.058 | 0.060          | 0.058 | 0.938    |
|       | $\gamma$ (1.875)    | 1.845 | 1.935 | 0.845 | 0.854          | 0.845 | 0.910    |
| M3    | $\sigma$ (1.75)     | 1.659 | 1.664 | 0.622 | 0.653          | 0.628 | 0.935    |
|       | $\kappa$ (0.6)      | 0.580 | 0.575 | 0.117 | 0.124          | 0.119 | 0.957    |
|       | $\alpha$ (2.5)      | 2.976 | 2.690 | 1.157 | 1.198          | 1.251 | 0.965    |
|       | $\beta_{11}$ (0.1)  | 0.100 | 0.099 | 0.017 | 0.017          | 0.017 | 0.944    |
|       | $\beta_{12}$ (0.1)  | 0.079 | 0.101 | 0.291 | 0.288          | 0.292 | 0.964    |
|       | $\beta_{13}$ (0.1)  | 0.112 | 0.111 | 0.284 | 0.287          | 0.284 | 0.957    |
|       | $\beta_{21}$ (0.05) | 0.047 | 0.048 | 0.007 | 0.007          | 0.008 | 0.958    |
|       | $\beta_{22}$ (0.2)  | 0.182 | 0.189 | 0.072 | 0.075          | 0.075 | 0.955    |
|       | $\beta_{23}$ (0.25) | 0.268 | 0.265 | 0.066 | 0.068          | 0.068 | 0.949    |
|       | $b$ (0.075)         | 0.543 | 0.206 | 0.814 | 7.701          | 0.939 | 0.783    |
|       | $\mu$ (1.875)       | 2.304 | 2.327 | 0.951 | 1.023          | 1.043 | 0.837    |
| M4    | $\sigma$ (1.75)     | 1.770 | 1.860 | 0.607 | 0.497          | 0.607 | 0.889    |
|       | $\kappa$ (0.6)      | 0.619 | 0.643 | 0.121 | 0.087          | 0.123 | 0.807    |
|       | $\alpha$ (2.5)      | 2.729 | 2.269 | 1.359 | 0.872          | 1.377 | 0.813    |
|       | $\beta_{11}$ (0.1)  | 0.100 | 0.099 | 0.018 | 0.016          | 0.018 | 0.936    |
|       | $\beta_{12}$ (0.1)  | 0.079 | 0.105 | 0.306 | 0.276          | 0.307 | 0.951    |
|       | $\beta_{13}$ (0.1)  | 0.142 | 0.130 | 0.294 | 0.274          | 0.297 | 0.941    |
|       | $\beta_{21}$ (0.05) | 0.050 | 0.052 | 0.007 | 0.005          | 0.007 | 0.793    |
|       | $\beta_{22}$ (0.2)  | 0.208 | 0.220 | 0.077 | 0.056          | 0.077 | 0.872    |
|       | $\beta_{23}$ (0.25) | 0.247 | 0.239 | 0.064 | 0.052          | 0.065 | 0.899    |
|       | $c$ (1.875)         | 1.786 | 1.000 | 1.101 | –              | 1.104 | –        |

Table 5. Simulation results for the scenario GH with  $(\sigma, \kappa, \alpha) = (1.75, 0.6, 2.5)$ ,  $\beta_1 = (0.1, 0.1, 0.1)$ ,  $\beta_2 = (0.05, 0.2, 0.25)$ ,  $n = 5000$ , and severe mismatch  $\gamma \sim Ga(1.875, 0.075)$ . Mean of the MLEs (MMLE), median of the MLEs (mMLE), empirical standard deviation (ESD), mean (estimated) standard error, root-mean-square error (RMSE), and coverage proportions (Coverage).

4.4  $n = 10000$ : Simulation design II

The results associated to  $n = 10000$  and design II are presented in Tables 14–17. The corresponding fitted hazards are presented in Figures 13–16.

5. RESULTS FOR NATIONAL LIFE TABLES

Table 19 shows the results for the fitted excess hazard models using life tables without the deprivation variable (*i.e.* national life tables). See the Section “Application: Lung Cancer data” of the paper for more

**Design II:  $\gamma = 1$** 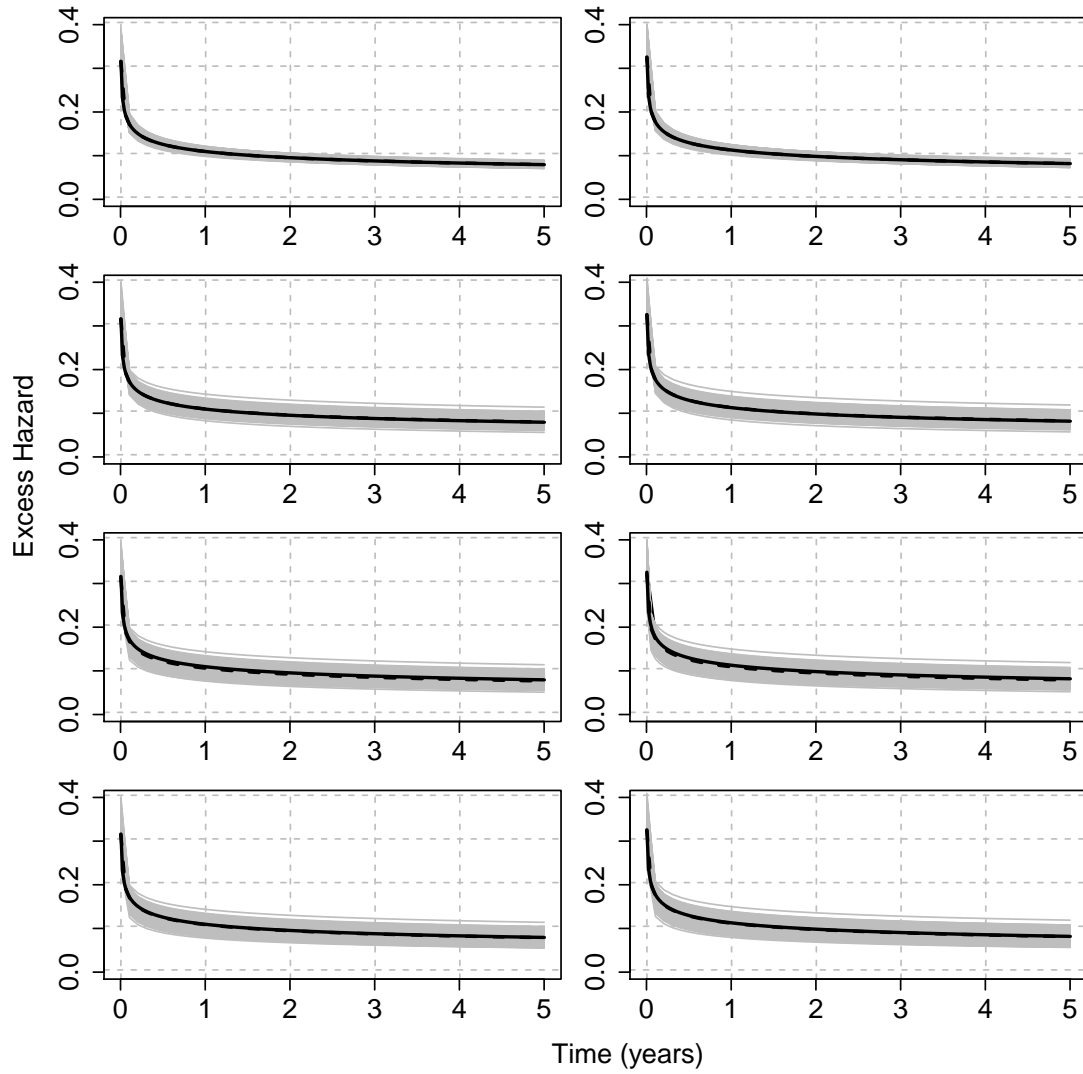

Fig. 13. Scenario with no mismatch  $\gamma = 1$ . Models M1–M4 from top to bottom. Mean of the fitted hazards (dashed lines), compared to the true generating hazard (continuous lines), and 1000 sample-specific fitted hazards (grey lines) for  $n = 10000$  and 45% censoring. Panels from left to right correspond to covariate values (age, sex, comorbidity) = (70, 0, 0), (70, 0, 1), respectively.

**Design II:**  $\gamma \sim Ga(1.2, 0.02)$

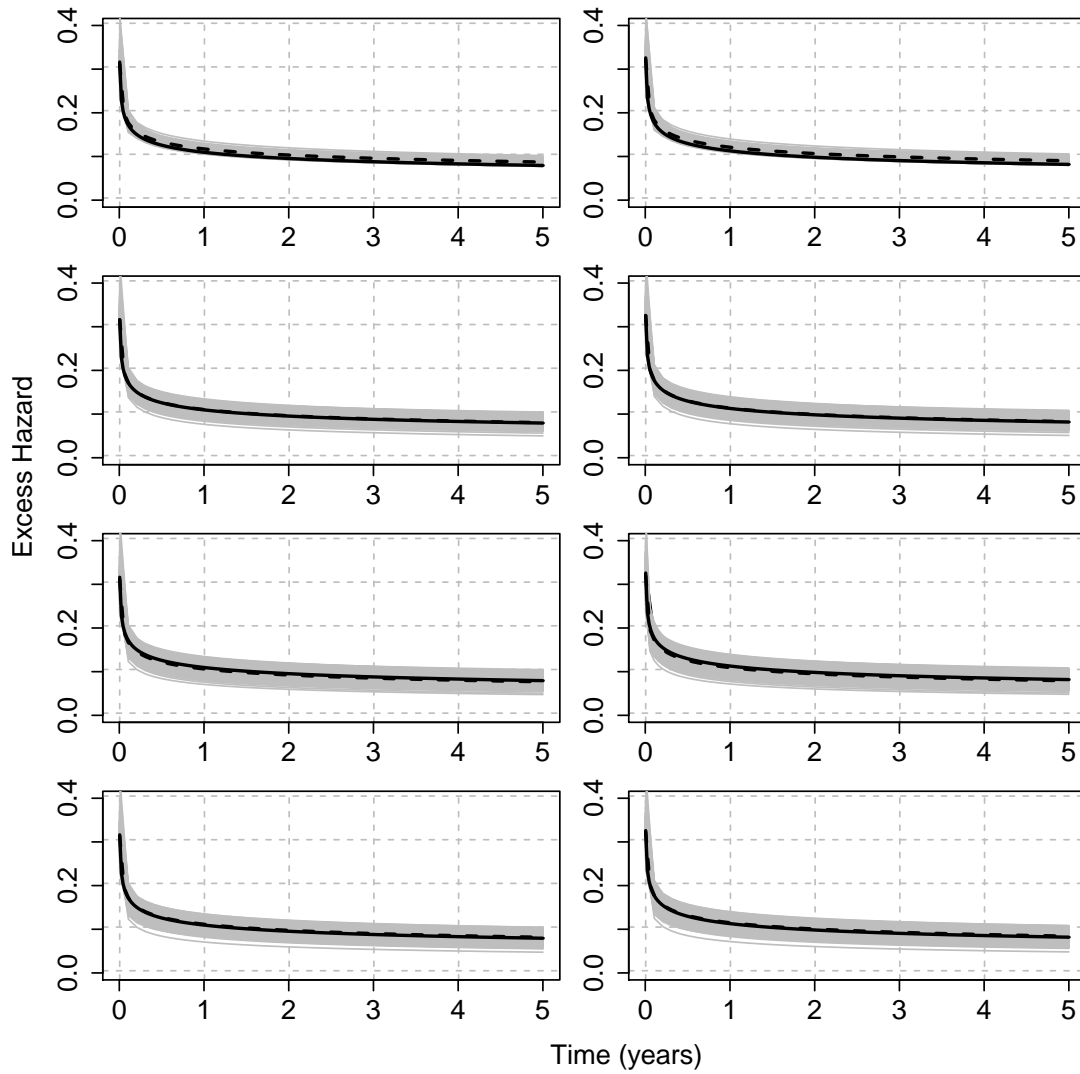

Fig. 14. Scenario with moderate mismatch  $\gamma \sim Ga(1.2, 0.02)$ . Models M1–M4 from top to bottom. Mean of the fitted hazards (dashed lines), compared to the true generating hazard (continuous lines), and 1000 sample-specific fitted hazards (grey lines) for  $n = 10000$  and 45% censoring. Panels from left to right correspond to covariate values (age, sex, comorbidity)=(70, 0, 0), (70, 0, 1), respectively.

**Design II:**  $\gamma \sim Ga(1.875, 0.075)$

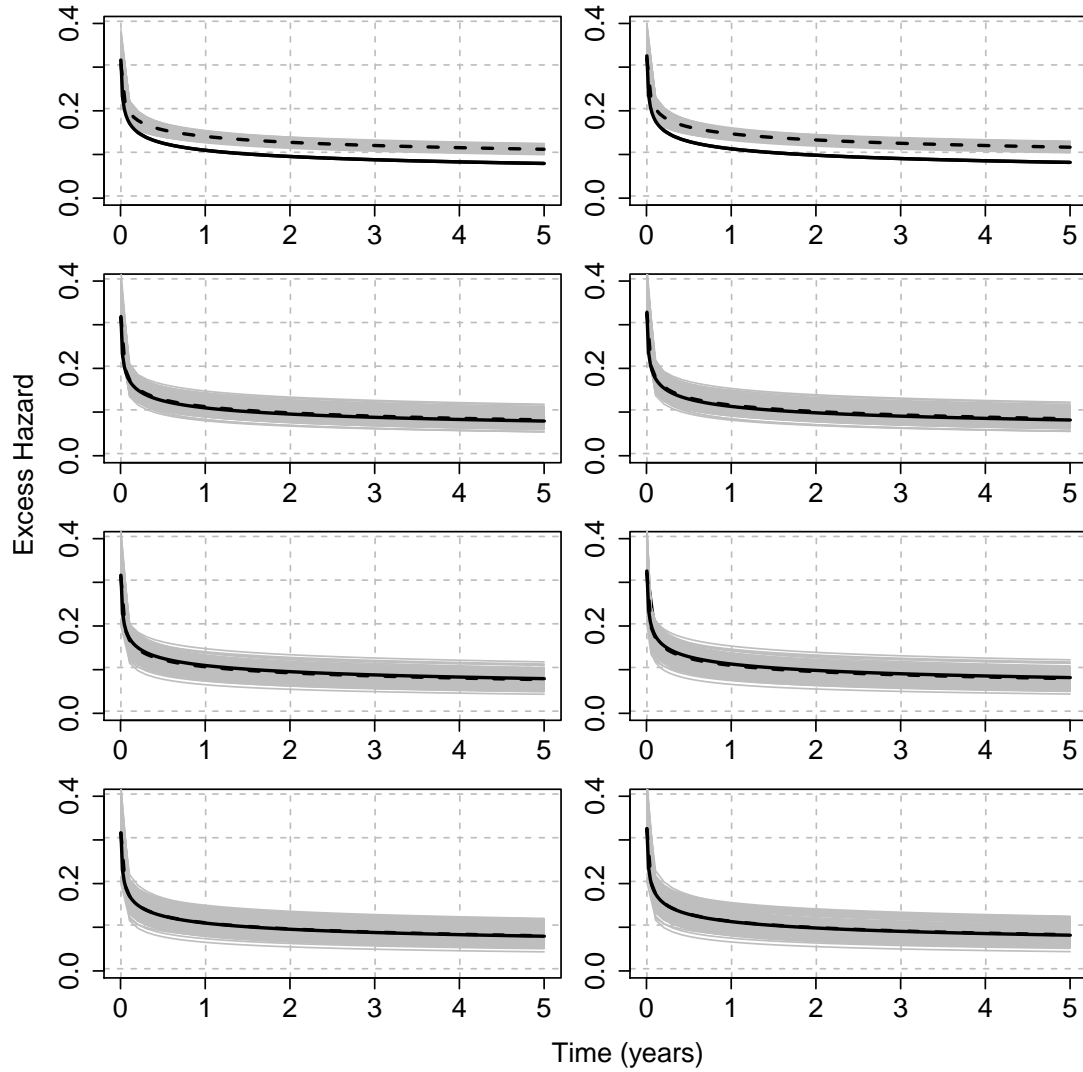

Fig. 15. Scenario with severe mismatch  $\gamma \sim Ga(1.875, 0.075)$ . Models M1–M4 from top to bottom. Mean of the fitted hazards (dashed lines), compared to the true generating hazard (continuous lines), and 1000 sample-specific fitted hazards (grey lines) for  $n = 10000$  and 45% censoring. Panels from left to right correspond to covariate values (age, sex, comorbidity) = (70, 0, 0), (70, 0, 1), respectively.

**Design II:**  $\gamma \sim Ga(6.5, 10)$

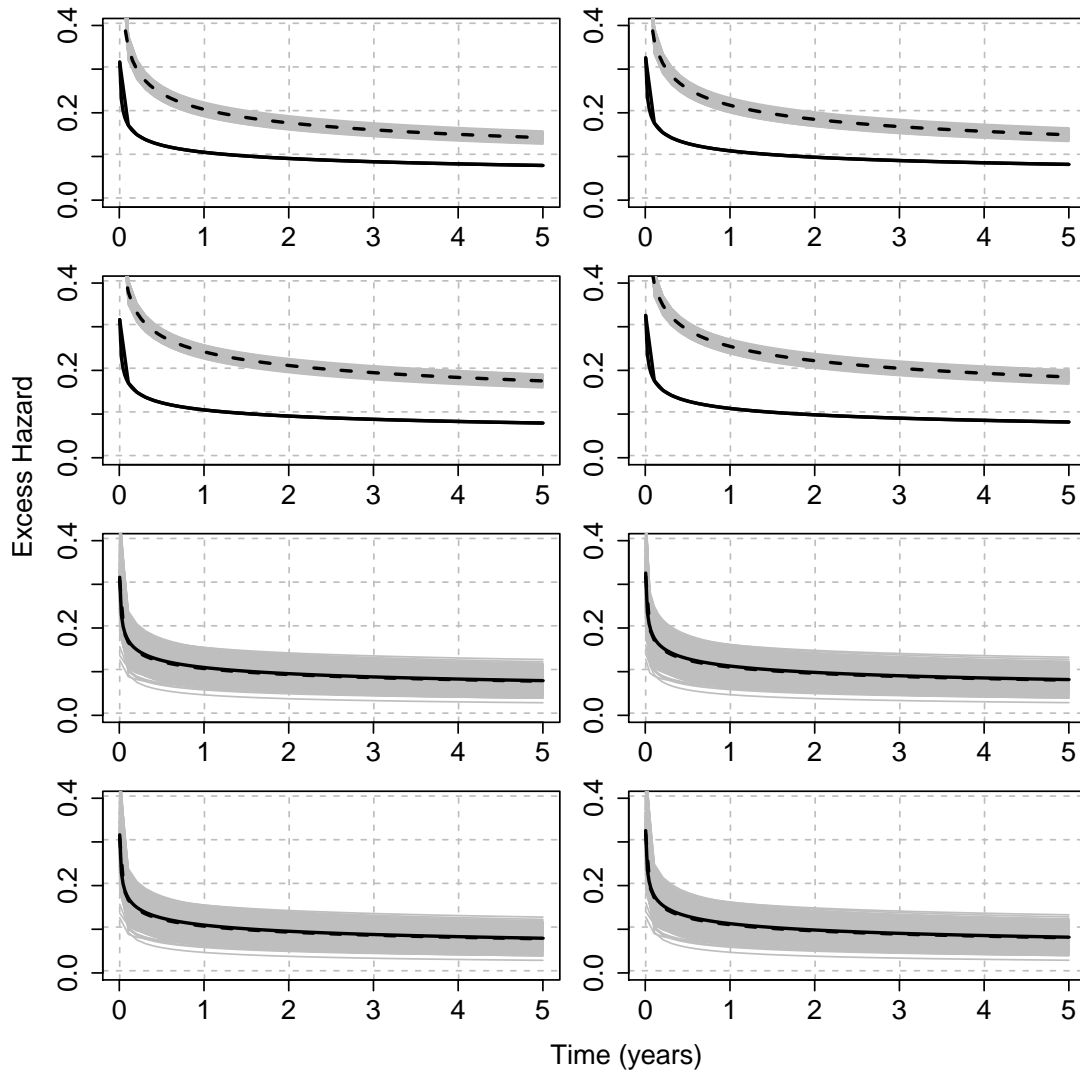

Fig. 16. Scenario with wide mismatch  $\gamma \sim Ga(6.5, 10)$ . Models M1–M4 from top to bottom. Mean of the fitted hazards (dashed lines), compared to the true generating hazard (continuous lines), and 1000 sample-specific fitted hazards (grey lines) for  $n = 10000$  and 45% censoring. Panels from left to right correspond to covariate values (age, sex, comorbidity)=(70, 0, 0), (70, 0, 1), respectively.

**Design I:**  $\gamma = 1$ 

| Model               | Parameter           | MMLE  | mMLE  | ESD   | Mean Std Error | RMSE  | Coverage |
|---------------------|---------------------|-------|-------|-------|----------------|-------|----------|
| M1                  | $\sigma$ (1.75)     | 1.797 | 1.772 | 0.322 | 0.298          | 0.325 | 0.912    |
|                     | $\kappa$ (0.6)      | 0.608 | 0.605 | 0.050 | 0.046          | 0.050 | 0.920    |
|                     | $\alpha$ (2.5)      | 2.488 | 2.483 | 0.332 | 0.313          | 0.332 | 0.922    |
|                     | $\beta_{11}$ (0.1)  | 0.102 | 0.101 | 0.010 | 0.010          | 0.011 | 0.956    |
|                     | $\beta_{12}$ (0.1)  | 0.092 | 0.098 | 0.179 | 0.166          | 0.179 | 0.936    |
|                     | $\beta_{13}$ (0.1)  | 0.095 | 0.094 | 0.177 | 0.166          | 0.177 | 0.940    |
|                     | $\beta_{21}$ (0.05) | 0.050 | 0.050 | 0.002 | 0.002          | 0.002 | 0.942    |
|                     | $\beta_{22}$ (0.2)  | 0.200 | 0.200 | 0.030 | 0.030          | 0.030 | 0.942    |
| $\beta_{23}$ (0.25) | 0.250               | 0.250 | 0.030 | 0.030 | 0.030          | 0.943 |          |
| M2                  | $\sigma$ (1.75)     | 1.701 | 1.718 | 0.397 | 0.384          | 0.399 | 0.941    |
|                     | $\kappa$ (0.6)      | 0.595 | 0.596 | 0.077 | 0.075          | 0.077 | 0.931    |
|                     | $\alpha$ (2.5)      | 2.650 | 2.532 | 0.622 | 0.572          | 0.639 | 0.932    |
|                     | $\beta_{11}$ (0.1)  | 0.101 | 0.101 | 0.010 | 0.010          | 0.010 | 0.958    |
|                     | $\beta_{12}$ (0.1)  | 0.105 | 0.105 | 0.168 | 0.164          | 0.168 | 0.953    |
|                     | $\beta_{13}$ (0.1)  | 0.098 | 0.091 | 0.174 | 0.170          | 0.174 | 0.944    |
|                     | $\beta_{21}$ (0.05) | 0.049 | 0.050 | 0.004 | 0.004          | 0.004 | 0.929    |
|                     | $\beta_{22}$ (0.2)  | 0.196 | 0.197 | 0.041 | 0.042          | 0.041 | 0.936    |
| $\beta_{23}$ (0.25) | 0.253               | 0.253 | 0.037 | 0.038 | 0.037          | 0.953 |          |
| $\gamma$ (1)        | 1.036               | 1.049 | 0.519 | 0.511 | 0.520          | 0.887 |          |
| M3                  | $\sigma$ (1.75)     | 1.670 | 1.684 | 0.423 | 0.425          | 0.430 | 0.956    |
|                     | $\kappa$ (0.6)      | 0.580 | 0.577 | 0.078 | 0.080          | 0.081 | 0.950    |
|                     | $\alpha$ (2.5)      | 2.781 | 2.667 | 0.695 | 0.659          | 0.750 | 0.961    |
|                     | $\beta_{11}$ (0.1)  | 0.100 | 0.099 | 0.010 | 0.010          | 0.010 | 0.960    |
|                     | $\beta_{12}$ (0.1)  | 0.083 | 0.086 | 0.176 | 0.174          | 0.177 | 0.959    |
|                     | $\beta_{13}$ (0.1)  | 0.097 | 0.092 | 0.179 | 0.175          | 0.179 | 0.953    |
|                     | $\beta_{21}$ (0.05) | 0.048 | 0.048 | 0.004 | 0.004          | 0.005 | 0.947    |
|                     | $\beta_{22}$ (0.2)  | 0.184 | 0.187 | 0.044 | 0.046          | 0.047 | 0.957    |
|                     | $\beta_{23}$ (0.25) | 0.264 | 0.262 | 0.041 | 0.042          | 0.044 | 0.963    |
|                     | $b$ (0)             | 0.489 | 0.128 | 0.772 | 1.154          | 0.914 | –        |
| $\mu$ (1)           | 1.341               | 1.360 | 0.604 | 0.645 | 0.694          | 0.810 |          |
| M4                  | $\sigma$ (1.75)     | 1.708 | 1.720 | 0.378 | 0.326          | 0.380 | 0.935    |
|                     | $\kappa$ (0.6)      | 0.593 | 0.596 | 0.067 | 0.053          | 0.068 | 0.909    |
|                     | $\alpha$ (2.5)      | 2.656 | 2.550 | 0.593 | 0.426          | 0.613 | 0.922    |
|                     | $\beta_{11}$ (0.1)  | 0.100 | 0.100 | 0.010 | 0.010          | 0.010 | 0.949    |
|                     | $\beta_{12}$ (0.1)  | 0.098 | 0.101 | 0.174 | 0.165          | 0.174 | 0.945    |
|                     | $\beta_{13}$ (0.1)  | 0.100 | 0.100 | 0.173 | 0.165          | 0.173 | 0.946    |
|                     | $\beta_{21}$ (0.05) | 0.049 | 0.050 | 0.004 | 0.003          | 0.004 | 0.907    |
|                     | $\beta_{22}$ (0.2)  | 0.194 | 0.197 | 0.039 | 0.033          | 0.039 | 0.920    |
|                     | $\beta_{23}$ (0.25) | 0.255 | 0.253 | 0.036 | 0.032          | 0.037 | 0.945    |
|                     | $c$ (1)             | 1.143 | 1.000 | 0.503 | –              | 0.523 | –        |

Table 6. Simulation results for the scenario GH with  $(\sigma, \kappa, \alpha) = (1.75, 0.6, 2.5)$ ,  $\beta_1 = (0.1, 0.1, 0.1)$ ,  $\beta_2 = (0.05, 0.2, 0.25)$ ,  $n = 10000$ , and no mismatch  $\gamma = 1$ . Mean of the MLEs (MMLE), median of the MLEs (mMLE), empirical standard deviation (ESD), mean (estimated) standard error, root-mean-square error (RMSE), and coverage proportions (Coverage).

details.

**Design I:**  $\gamma \sim Ga(1.2, 0.02)$

| Model               | Parameter           | MMLE  | mMLE  | ESD   | Mean Std Error | RMSE  | Coverage |
|---------------------|---------------------|-------|-------|-------|----------------|-------|----------|
| M1                  | $\sigma$ (1.75)     | 1.846 | 1.846 | 0.305 | 0.291          | 0.319 | 0.906    |
|                     | $\kappa$ (0.6)      | 0.625 | 0.623 | 0.049 | 0.047          | 0.055 | 0.890    |
|                     | $\alpha$ (2.5)      | 2.384 | 2.360 | 0.308 | 0.291          | 0.329 | 0.898    |
|                     | $\beta_{11}$ (0.1)  | 0.101 | 0.100 | 0.010 | 0.010          | 0.010 | 0.949    |
|                     | $\beta_{12}$ (0.1)  | 0.092 | 0.098 | 0.185 | 0.170          | 0.185 | 0.934    |
|                     | $\beta_{13}$ (0.1)  | 0.119 | 0.119 | 0.177 | 0.171          | 0.178 | 0.952    |
|                     | $\beta_{21}$ (0.05) | 0.051 | 0.051 | 0.002 | 0.002          | 0.002 | 0.910    |
|                     | $\beta_{22}$ (0.2)  | 0.209 | 0.209 | 0.030 | 0.029          | 0.031 | 0.936    |
| $\beta_{23}$ (0.25) | 0.241               | 0.241 | 0.030 | 0.029 | 0.031          | 0.933 |          |
| M2                  | $\sigma$ (1.75)     | 1.671 | 1.697 | 0.409 | 0.392          | 0.417 | 0.940    |
|                     | $\kappa$ (0.6)      | 0.591 | 0.590 | 0.080 | 0.077          | 0.081 | 0.929    |
|                     | $\alpha$ (2.5)      | 2.692 | 2.571 | 0.655 | 0.603          | 0.682 | 0.936    |
|                     | $\beta_{11}$ (0.1)  | 0.100 | 0.100 | 0.010 | 0.010          | 0.010 | 0.953    |
|                     | $\beta_{12}$ (0.1)  | 0.110 | 0.112 | 0.174 | 0.167          | 0.174 | 0.943    |
|                     | $\beta_{13}$ (0.1)  | 0.105 | 0.099 | 0.173 | 0.172          | 0.173 | 0.954    |
|                     | $\beta_{21}$ (0.05) | 0.049 | 0.050 | 0.004 | 0.004          | 0.004 | 0.921    |
|                     | $\beta_{22}$ (0.2)  | 0.195 | 0.196 | 0.044 | 0.043          | 0.045 | 0.943    |
| $\beta_{23}$ (0.25) | 0.253               | 0.251 | 0.039 | 0.039 | 0.039          | 0.944 |          |
| $\gamma$ (1.2)      | 1.224               | 1.270 | 0.556 | 0.536 | 0.556          | 0.900 |          |
| M3                  | $\sigma$ (1.75)     | 1.648 | 1.662 | 0.430 | 0.430          | 0.442 | 0.961    |
|                     | $\kappa$ (0.6)      | 0.579 | 0.578 | 0.080 | 0.081          | 0.083 | 0.953    |
|                     | $\alpha$ (2.5)      | 2.804 | 2.679 | 0.708 | 0.679          | 0.771 | 0.959    |
|                     | $\beta_{11}$ (0.1)  | 0.099 | 0.099 | 0.010 | 0.010          | 0.010 | 0.952    |
|                     | $\beta_{12}$ (0.1)  | 0.090 | 0.092 | 0.183 | 0.176          | 0.183 | 0.947    |
|                     | $\beta_{13}$ (0.1)  | 0.107 | 0.098 | 0.177 | 0.177          | 0.177 | 0.957    |
|                     | $\beta_{21}$ (0.05) | 0.048 | 0.048 | 0.004 | 0.004          | 0.005 | 0.939    |
|                     | $\beta_{22}$ (0.2)  | 0.184 | 0.186 | 0.047 | 0.047          | 0.049 | 0.947    |
|                     | $\beta_{23}$ (0.25) | 0.263 | 0.260 | 0.042 | 0.043          | 0.044 | 0.955    |
| $b$ (0.02)          | 0.401               | 0.081 | 0.663 | 0.670 | 0.764          | 0.717 |          |
| $\mu$ (1.2)         | 1.506               | 1.543 | 0.605 | 0.655 | 0.678          | 0.834 |          |
| M4                  | $\sigma$ (1.75)     | 1.728 | 1.761 | 0.391 | 0.328          | 0.391 | 0.924    |
|                     | $\kappa$ (0.6)      | 0.601 | 0.607 | 0.072 | 0.054          | 0.072 | 0.886    |
|                     | $\alpha$ (2.5)      | 2.612 | 2.473 | 0.625 | 0.428          | 0.634 | 0.901    |
|                     | $\beta_{11}$ (0.1)  | 0.100 | 0.099 | 0.011 | 0.010          | 0.011 | 0.948    |
|                     | $\beta_{12}$ (0.1)  | 0.100 | 0.098 | 0.177 | 0.169          | 0.177 | 0.944    |
|                     | $\beta_{13}$ (0.1)  | 0.116 | 0.107 | 0.174 | 0.169          | 0.175 | 0.951    |
|                     | $\beta_{21}$ (0.05) | 0.050 | 0.051 | 0.004 | 0.003          | 0.004 | 0.872    |
|                     | $\beta_{22}$ (0.2)  | 0.198 | 0.202 | 0.042 | 0.034          | 0.042 | 0.910    |
|                     | $\beta_{23}$ (0.25) | 0.251 | 0.249 | 0.038 | 0.033          | 0.038 | 0.920    |
| $c$ (1.2)           | 1.219               | 1.000 | 0.530 | –     | 0.530          | –     |          |

Table 7. Simulation results for the scenario GH with  $(\sigma, \kappa, \alpha) = (1.75, 0.6, 2.5)$ ,  $\beta_1 = (0.1, 0.1, 0.1)$ ,  $\beta_2 = (0.05, 0.2, 0.25)$ ,  $n = 10000$ , and moderate mismatch  $\gamma \sim Ga(1.2, 0.02)$ . Mean of the MLEs (MMLE), median of the MLEs (mMLE), empirical standard deviation (ESD), mean (estimated) standard error, root-mean-square error (RMSE), and coverage proportions (Coverage).

6. MISSPECIFICATION OF THE FRAILTY DISTRIBUTION

In this section, we present a simulation study where we assess the effect of misspecifying the distribution of the correction parameter  $\gamma$  in model (2.5). We simulate  $\gamma$  from a lognormal distribution with log-scale parameter  $\sigma = 0.2$  and log-location parameter  $\mu = 0.63$ . This frailty distribution has mean 1.91 and variance 0.5. The Kullback-Liebler divergence between this distribution and the  $Ga(1.875, 0.075)$ , employed in the severe mismatch scenario, is 0.01. Thus, this represents a scenario where the correction is not a gamma variate, but the shape of its distribution can be closely reproduced with a gamma distribution. Results are presented in Tables 20–21 and Figures 17–18, which very similar to those obtained in the

**Design I:**  $\gamma \sim Ga(1.875, 0.075)$ 

| Model | Parameter           | MMLE        | mMLE  | ESD   | Mean Std Error | RMSE  | Coverage |
|-------|---------------------|-------------|-------|-------|----------------|-------|----------|
| M1    | $\sigma$ (1.75)     | 2.024       | 2.026 | 0.261 | 0.264          | 0.378 | 0.757    |
|       | $\kappa$ (0.6)      | 0.684       | 0.684 | 0.046 | 0.047          | 0.096 | 0.522    |
|       | $\alpha$ (2.5)      | 2.059       | 2.040 | 0.223 | 0.224          | 0.494 | 0.528    |
|       | $\beta_{11}$ (0.1)  | 0.101       | 0.101 | 0.011 | 0.011          | 0.011 | 0.952    |
|       | $\beta_{12}$ (0.1)  | 0.088       | 0.085 | 0.201 | 0.189          | 0.202 | 0.949    |
|       | $\beta_{13}$ (0.1)  | 0.151       | 0.151 | 0.192 | 0.189          | 0.199 | 0.948    |
|       | $\beta_{21}$ (0.05) | 0.054       | 0.054 | 0.002 | 0.002          | 0.005 | 0.507    |
|       | $\beta_{22}$ (0.2)  | 0.242       | 0.242 | 0.027 | 0.028          | 0.050 | 0.681    |
|       | $\beta_{23}$ (0.25) | 0.217       | 0.218 | 0.028 | 0.028          | 0.043 | 0.788    |
| M2    | $\sigma$ (1.75)     | 1.661       | 1.693 | 0.424 | 0.413          | 0.433 | 0.945    |
|       | $\kappa$ (0.6)      | 0.591       | 0.590 | 0.084 | 0.083          | 0.085 | 0.955    |
|       | $\alpha$ (2.5)      | 2.703       | 2.560 | 0.685 | 0.654          | 0.714 | 0.953    |
|       | $\beta_{11}$ (0.1)  | 0.101       | 0.101 | 0.011 | 0.011          | 0.011 | 0.945    |
|       | $\beta_{12}$ (0.1)  | 0.114       | 0.106 | 0.184 | 0.180          | 0.184 | 0.954    |
|       | $\beta_{13}$ (0.1)  | 0.092       | 0.096 | 0.182 | 0.186          | 0.182 | 0.957    |
|       | $\beta_{21}$ (0.05) | 0.050       | 0.050 | 0.004 | 0.004          | 0.004 | 0.941    |
|       | $\beta_{22}$ (0.2)  | 0.198       | 0.202 | 0.048 | 0.046          | 0.048 | 0.945    |
|       | $\beta_{23}$ (0.25) | 0.252       | 0.251 | 0.042 | 0.042          | 0.042 | 0.942    |
|       | $\gamma$ (1.875)    | 1.854       | 1.899 | 0.639 | 0.618          | 0.639 | 0.910    |
| M3    | $\sigma$ (1.75)     | 1.654       | 1.679 | 0.458 | 0.456          | 0.468 | 0.956    |
|       | $\kappa$ (0.6)      | 0.580       | 0.578 | 0.087 | 0.087          | 0.089 | 0.958    |
|       | $\alpha$ (2.5)      | 2.813       | 2.654 | 0.762 | 0.734          | 0.824 | 0.967    |
|       | $\beta_{11}$ (0.1)  | 0.100       | 0.100 | 0.012 | 0.011          | 0.011 | 0.940    |
|       | $\beta_{12}$ (0.1)  | 0.084       | 0.088 | 0.193 | 0.193          | 0.194 | 0.958    |
|       | $\beta_{13}$ (0.1)  | 0.097       | 0.098 | 0.189 | 0.193          | 0.189 | 0.961    |
|       | $\beta_{21}$ (0.05) | 0.048       | 0.048 | 0.005 | 0.005          | 0.005 | 0.956    |
|       | $\beta_{22}$ (0.2)  | 0.188       | 0.192 | 0.050 | 0.051          | 0.052 | 0.947    |
|       | $\beta_{23}$ (0.25) | 0.262       | 0.259 | 0.045 | 0.046          | 0.046 | 0.959    |
|       |                     | $b$ (0.075) | 0.355 | 0.134 | 0.543          | 0.538 | 0.610    |
|       | $\mu$ (1.875)       | 2.178       | 2.207 | 0.706 | 0.732          | 0.768 | 0.843    |
| M4    | $\sigma$ (1.75)     | 1.733       | 1.792 | 0.467 | 0.372          | 0.467 | 0.870    |
|       | $\kappa$ (0.6)      | 0.609       | 0.622 | 0.097 | 0.065          | 0.097 | 0.726    |
|       | $\alpha$ (2.5)      | 2.620       | 2.395 | 0.766 | 0.546          | 0.775 | 0.744    |
|       | $\beta_{11}$ (0.1)  | 0.100       | 0.100 | 0.012 | 0.011          | 0.012 | 0.937    |
|       | $\beta_{12}$ (0.1)  | 0.097       | 0.094 | 0.194 | 0.186          | 0.194 | 0.951    |
|       | $\beta_{13}$ (0.1)  | 0.112       | 0.109 | 0.193 | 0.186          | 0.193 | 0.947    |
|       | $\beta_{21}$ (0.05) | 0.050       | 0.051 | 0.005 | 0.003          | 0.005 | 0.723    |
|       | $\beta_{22}$ (0.2)  | 0.205       | 0.213 | 0.053 | 0.039          | 0.053 | 0.802    |
|       | $\beta_{23}$ (0.25) | 0.247       | 0.241 | 0.046 | 0.037          | 0.046 | 0.872    |
|       |                     | $c$ (1.875) | 1.780 | 1.813 | 0.840          | –     | 0.845    |

Table 8. Simulation results for the scenario GH with  $(\sigma, \kappa, \alpha) = (1.75, 0.6, 2.5)$ ,  $\beta_1 = (0.1, 0.1, 0.1)$ ,  $\beta_2 = (0.05, 0.2, 0.25)$ ,  $n = 10000$ , and severe mismatch  $\gamma \sim Ga(1.875, 0.075)$ . Mean of the MLEs (MMLE), median of the MLEs (mMLE), empirical standard deviation (ESD), mean (estimated) standard error, root-mean-square error (RMSE), and coverage proportions (Coverage).

gamma frailty scenario. This indicates that model M3 can capture mismatches in the life tables even in cases where the mismatch is not generated by a gamma distribution, but as long as the gamma distribution can approximate the shape of the true generating correction for some values of the parameters.

## REFERENCES

PERME, M.P., STARE, J. AND ESTÈVE, J. (2012). On estimation in relative survival. *Biometrics* **68**, 113–120.



## Misspecified Frailty

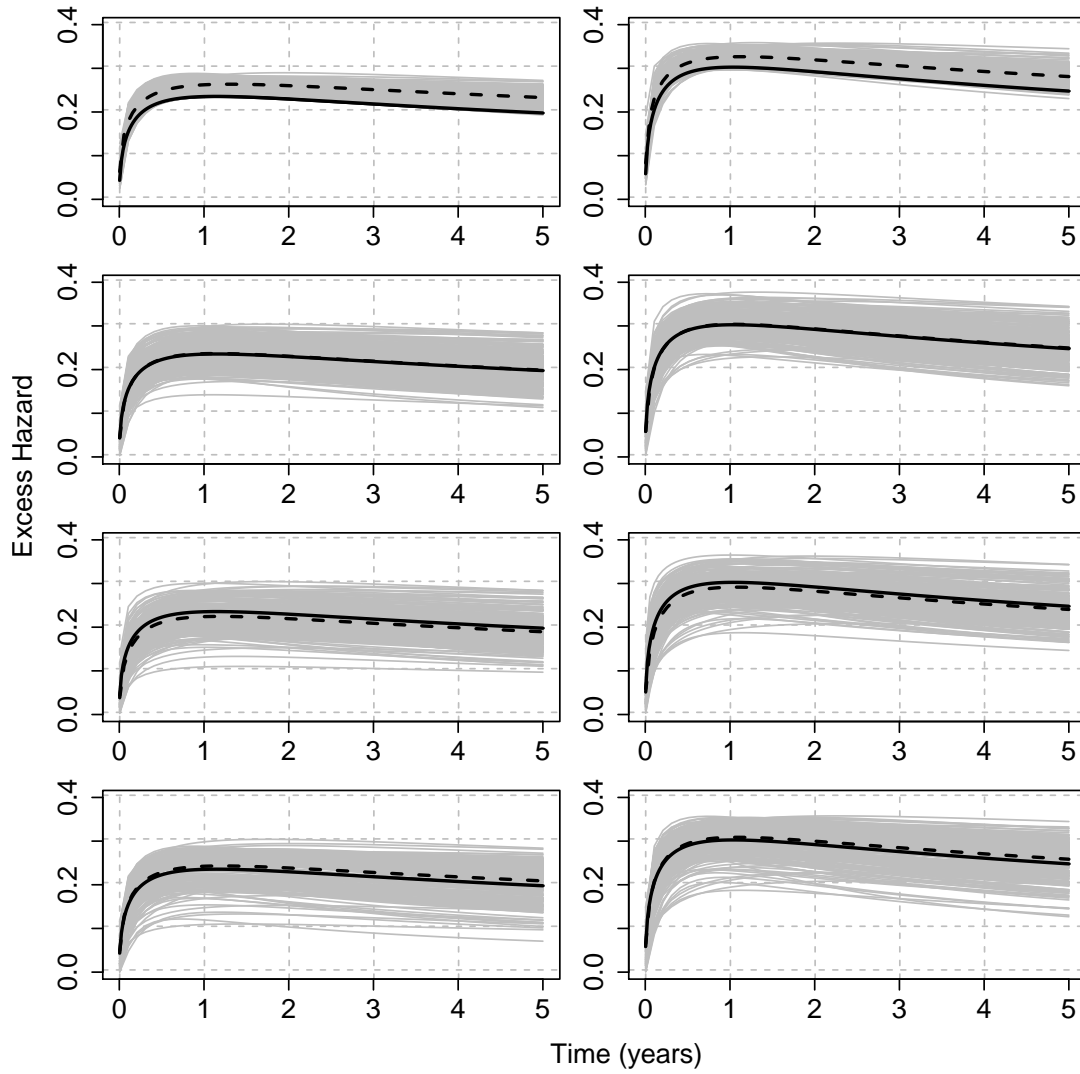

Fig. 17. Scenario with misspecified mismatch  $\gamma \sim \text{lognormal}(0.63, 0.2)$ . Models M1–M4 from top to bottom. Mean of the fitted hazards (dashed lines), compared to the true generating hazard (continuous lines), and 250 sample-specific fitted hazards (grey lines) for  $n = 5000$  and 30% censoring. Panels from left to right correspond to covariate values (age, sex, comorbidity) = (70, 0, 0), (70, 0, 1), respectively.

## Misspecified Frailty

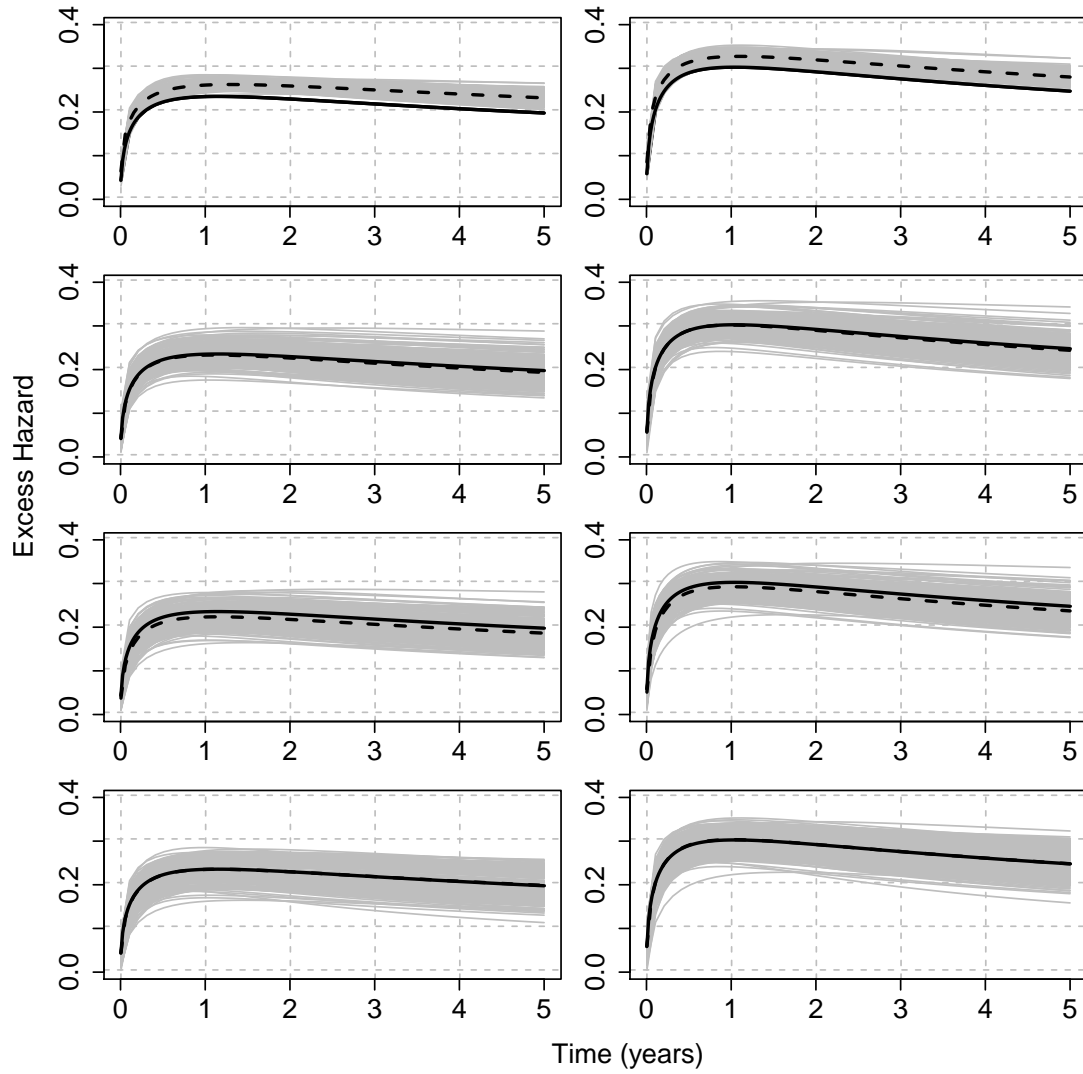

Fig. 18. Scenario with misspecified mismatch  $\gamma \sim \text{lognormal}(0.63, 0.2)$ . Models M1–M4 from top to bottom. Mean of the fitted hazards (dashed lines), compared to the true generating hazard (continuous lines), and 250 sample-specific fitted hazards (grey lines) for  $n = 10000$  and 30% censoring. Panels from left to right correspond to covariate values (age, sex, comorbidity) = (70, 0, 0), (70, 0, 1), respectively.

**Design I:**  $\gamma \sim Ga(6.5, 10)$ 

| Model               | Parameter           | MMLE   | mMLE   | ESD   | Mean Std Error | RMSE  | Coverage |
|---------------------|---------------------|--------|--------|-------|----------------|-------|----------|
| M1                  | $\sigma$ (1.75)     | 1.216  | 1.215  | 0.161 | 0.154          | 0.558 | 0.123    |
|                     | $\kappa$ (0.6)      | 0.592  | 0.593  | 0.033 | 0.032          | 0.034 | 0.933    |
|                     | $\alpha$ (2.5)      | 2.337  | 2.313  | 0.221 | 0.211          | 0.275 | 0.850    |
|                     | $\beta_{11}$ (0.1)  | 0.120  | 0.119  | 0.009 | 0.009          | 0.021 | 0.384    |
|                     | $\beta_{12}$ (0.1)  | 0.404  | 0.409  | 0.174 | 0.154          | 0.351 | 0.473    |
|                     | $\beta_{13}$ (0.1)  | -0.045 | -0.046 | 0.165 | 0.155          | 0.219 | 0.857    |
|                     | $\beta_{21}$ (0.05) | 0.065  | 0.065  | 0.002 | 0.002          | 0.015 | 0.000    |
|                     | $\beta_{22}$ (0.2)  | 0.293  | 0.294  | 0.036 | 0.032          | 0.100 | 0.167    |
| $\beta_{23}$ (0.25) | 0.162               | 0.163  | 0.033  | 0.032 | 0.094          | 0.197 |          |
| M2                  | $\sigma$ (1.75)     | 1.318  | 1.324  | 0.151 | 0.166          | 0.458 | 0.338    |
|                     | $\kappa$ (0.6)      | 0.635  | 0.639  | 0.040 | 0.046          | 0.054 | 0.747    |
|                     | $\alpha$ (2.5)      | 2.108  | 2.066  | 0.233 | 0.252          | 0.456 | 0.544    |
|                     | $\beta_{11}$ (0.1)  | 0.120  | 0.119  | 0.009 | 0.009          | 0.021 | 0.390    |
|                     | $\beta_{12}$ (0.1)  | 0.408  | 0.409  | 0.157 | 0.157          | 0.346 | 0.497    |
|                     | $\beta_{13}$ (0.1)  | -0.017 | -0.018 | 0.152 | 0.158          | 0.192 | 0.900    |
|                     | $\beta_{21}$ (0.05) | 0.067  | 0.067  | 0.002 | 0.002          | 0.017 | 0.000    |
|                     | $\beta_{22}$ (0.2)  | 0.308  | 0.310  | 0.031 | 0.032          | 0.113 | 0.097    |
| $\beta_{23}$ (0.25) | 0.153               | 0.153  | 0.029  | 0.031 | 0.101          | 0.123 |          |
| $\gamma$ (6.5)      | 0.323               | 0.037  | 0.450  | 0.412 | 6.193          | 0.805 |          |
| M3                  | $\sigma$ (1.75)     | 1.542  | 1.554  | 0.538 | 0.530          | 0.576 | 0.975    |
|                     | $\kappa$ (0.6)      | 0.564  | 0.573  | 0.094 | 0.089          | 0.101 | 0.945    |
|                     | $\alpha$ (2.5)      | 3.052  | 2.755  | 1.144 | 0.930          | 1.270 | 0.970    |
|                     | $\beta_{11}$ (0.1)  | 0.100  | 0.100  | 0.020 | 0.018          | 0.020 | 0.908    |
|                     | $\beta_{12}$ (0.1)  | 0.108  | 0.101  | 0.247 | 0.239          | 0.247 | 0.942    |
|                     | $\beta_{13}$ (0.1)  | 0.084  | 0.083  | 0.240 | 0.231          | 0.241 | 0.947    |
|                     | $\beta_{21}$ (0.05) | 0.048  | 0.049  | 0.006 | 0.006          | 0.007 | 0.960    |
|                     | $\beta_{22}$ (0.2)  | 0.185  | 0.192  | 0.065 | 0.062          | 0.067 | 0.936    |
| $\beta_{23}$ (0.25) | 0.264               | 0.258  | 0.060  | 0.057 | 0.062          | 0.954 |          |
| $b$ (10)            | 12.014              | 9.648  | 9.291  | 6.876 | 9.503          | 0.853 |          |
| $\mu$ (6.5)         | 6.951               | 6.985  | 1.230  | 1.244 | 1.309          | 0.877 |          |
| M4                  | $\sigma$ (1.75)     | 1.539  | 1.554  | 0.540 | 0.528          | 0.579 | 0.966    |
|                     | $\kappa$ (0.6)      | 0.564  | 0.573  | 0.094 | 0.089          | 0.101 | 0.943    |
|                     | $\alpha$ (2.5)      | 3.053  | 2.755  | 1.144 | 0.927          | 1.271 | 0.967    |
|                     | $\beta_{11}$ (0.1)  | 0.100  | 0.100  | 0.020 | 0.018          | 0.020 | 0.905    |
|                     | $\beta_{12}$ (0.1)  | 0.109  | 0.102  | 0.247 | 0.239          | 0.247 | 0.940    |
|                     | $\beta_{13}$ (0.1)  | 0.084  | 0.083  | 0.240 | 0.231          | 0.240 | 0.947    |
|                     | $\beta_{21}$ (0.05) | 0.048  | 0.049  | 0.007 | 0.006          | 0.007 | 0.954    |
|                     | $\beta_{22}$ (0.2)  | 0.186  | 0.193  | 0.066 | 0.062          | 0.067 | 0.933    |
| $\beta_{23}$ (0.25) | 0.263               | 0.258  | 0.061  | 0.057 | 0.062          | 0.949 |          |
| $c$ (6.5)           | 6.948               | 6.985  | 1.271  | –     | 1.347          | –     |          |

Table 9. Simulation results for the scenario GH with  $(\sigma, \kappa, \alpha) = (1.75, 0.6, 2.5)$ ,  $\beta_1 = (0.1, 0.1, 0.1)$ ,  $\beta_2 = (0.05, 0.2, 0.25)$ ,  $n = 10000$ , and wide mismatch  $\gamma \sim Ga(6.5, 10)$ . Mean of the MLEs (MMLE), median of the MLEs (mMLE), empirical standard deviation (ESD), mean (estimated) standard error, root-mean-square error (RMSE), and coverage proportions (Coverage).

RUBIO, F.J., REMONTET, L., JEWELL, N.P. AND BELOT, A. (2018). On a general structure for hazard-based regression models: an application to population-based cancer research. *Statistical Methods in Medical Research* **in press**, na–na.

[Received August 1, 2010; revised October 1, 2010; accepted for publication November 1, 2010]

**Design II:  $\gamma = 1$** 

| Model | Parameter        | MMLE   | mMLE   | ESD   | Mean Std Error | RMSE  | Coverage |
|-------|------------------|--------|--------|-------|----------------|-------|----------|
| M1    | $\sigma$ (12)    | 12.020 | 11.978 | 0.839 | 0.856          | 0.839 | 0.946    |
|       | $\kappa$ (0.8)   | 0.801  | 0.800  | 0.020 | 0.020          | 0.020 | 0.954    |
|       | $\beta_1$ (0.03) | 0.030  | 0.030  | 0.002 | 0.002          | 0.002 | 0.954    |
|       | $\beta_2$ (0.1)  | 0.100  | 0.101  | 0.057 | 0.058          | 0.057 | 0.952    |
|       | $\beta_3$ (0.1)  | 0.099  | 0.099  | 0.058 | 0.058          | 0.058 | 0.948    |
| M2    | $\sigma$ (12)    | 12.163 | 11.963 | 1.886 | 1.899          | 1.892 | 0.952    |
|       | $\kappa$ (0.8)   | 0.801  | 0.801  | 0.029 | 0.028          | 0.029 | 0.949    |
|       | $\beta_1$ (0.03) | 0.030  | 0.030  | 0.005 | 0.005          | 0.005 | 0.953    |
|       | $\beta_2$ (0.1)  | 0.099  | 0.103  | 0.071 | 0.070          | 0.071 | 0.954    |
|       | $\beta_3$ (0.1)  | 0.099  | 0.099  | 0.059 | 0.059          | 0.059 | 0.952    |
|       | $\gamma$ (1)     | 0.984  | 1.007  | 0.242 | 0.239          | 0.243 | 0.936    |
| M3    | $\sigma$ (12)    | 13.179 | 12.841 | 2.555 | 2.730          | 2.813 | 0.967    |
|       | $\kappa$ (0.8)   | 0.796  | 0.796  | 0.030 | 0.030          | 0.030 | 0.960    |
|       | $\beta_1$ (0.03) | 0.028  | 0.028  | 0.005 | 0.006          | 0.005 | 0.956    |
|       | $\beta_2$ (0.1)  | 0.083  | 0.087  | 0.079 | 0.079          | 0.081 | 0.958    |
|       | $\beta_3$ (0.1)  | 0.105  | 0.104  | 0.063 | 0.063          | 0.064 | 0.958    |
|       | $b$ (0)          | 0.260  | 0.022  | 0.386 | 0.328          | 0.465 | –        |
|       | $\mu$ (1)        | 1.158  | 1.136  | 0.331 | 0.357          | 0.367 | 0.892    |
| M4    | $\sigma$ (12)    | 12.365 | 12.066 | 2.080 | 1.195          | 2.110 | 0.903    |
|       | $\kappa$ (0.8)   | 0.800  | 0.800  | 0.027 | 0.022          | 0.027 | 0.935    |
|       | $\beta_1$ (0.03) | 0.030  | 0.030  | 0.004 | 0.003          | 0.004 | 0.910    |
|       | $\beta_2$ (0.1)  | 0.096  | 0.099  | 0.070 | 0.061          | 0.070 | 0.932    |
|       | $\beta_3$ (0.1)  | 0.101  | 0.100  | 0.060 | 0.059          | 0.060 | 0.949    |
|       | $c$ (1)          | 1.028  | 1.000  | 0.250 | –              | 0.252 | –        |

Table 10. Simulation results for the scenario GH with  $(\sigma, \kappa) = (12, 0.8)$ ,  $\beta = (0.03, 0.1, 0.1)$ ,  $n = 5000$ , and no mismatch  $\gamma = 1$ . Mean of the MLEs (MMLE), median of the MLEs (mMLE), empirical standard deviation (ESD), mean (estimated) standard error, root-mean-square error (RMSE), and coverage proportions (Coverage).

**Design II:**  $\gamma \sim Ga(1.2, 0.02)$ 

| Model | Parameter        | MMLE   | mMLE   | ESD   | Mean Std Error | RMSE  | Coverage |
|-------|------------------|--------|--------|-------|----------------|-------|----------|
| M1    | $\sigma$ (12)    | 10.827 | 10.778 | 0.709 | 0.718          | 1.370 | 0.639    |
|       | $\kappa$ (0.8)   | 0.816  | 0.815  | 0.019 | 0.020          | 0.025 | 0.879    |
|       | $\beta_1$ (0.03) | 0.033  | 0.033  | 0.002 | 0.002          | 0.004 | 0.741    |
|       | $\beta_2$ (0.1)  | 0.128  | 0.127  | 0.055 | 0.055          | 0.062 | 0.913    |
|       | $\beta_3$ (0.1)  | 0.092  | 0.092  | 0.054 | 0.055          | 0.055 | 0.955    |
| M2    | $\sigma$ (12)    | 12.257 | 11.966 | 2.033 | 1.990          | 2.048 | 0.953    |
|       | $\kappa$ (0.8)   | 0.799  | 0.800  | 0.028 | 0.029          | 0.028 | 0.953    |
|       | $\beta_1$ (0.03) | 0.030  | 0.030  | 0.005 | 0.005          | 0.005 | 0.959    |
|       | $\beta_2$ (0.1)  | 0.096  | 0.098  | 0.072 | 0.072          | 0.072 | 0.949    |
|       | $\beta_3$ (0.1)  | 0.100  | 0.098  | 0.060 | 0.061          | 0.060 | 0.954    |
|       | $\gamma$ (1.2)   | 1.188  | 1.206  | 0.248 | 0.249          | 0.248 | 0.948    |
| M3    | $\sigma$ (12)    | 13.322 | 12.807 | 2.673 | 2.855          | 2.980 | 0.967    |
|       | $\kappa$ (0.8)   | 0.794  | 0.795  | 0.030 | 0.031          | 0.030 | 0.969    |
|       | $\beta_1$ (0.03) | 0.028  | 0.028  | 0.005 | 0.006          | 0.006 | 0.955    |
|       | $\beta_2$ (0.1)  | 0.078  | 0.081  | 0.080 | 0.082          | 0.083 | 0.960    |
|       | $\beta_3$ (0.1)  | 0.105  | 0.104  | 0.064 | 0.066          | 0.064 | 0.958    |
|       | $b$ (0.02)       | 0.251  | 0.069  | 0.356 | 0.306          | 0.425 | 0.719    |
|       | $\mu$ (1.2)      | 1.374  | 1.351  | 0.341 | 0.370          | 0.382 | 0.898    |
| M4    | $\sigma$ (12)    | 12.061 | 11.172 | 2.482 | 1.371          | 2.482 | 0.705    |
|       | $\kappa$ (0.8)   | 0.804  | 0.807  | 0.028 | 0.023          | 0.029 | 0.904    |
|       | $\beta_1$ (0.03) | 0.030  | 0.032  | 0.005 | 0.003          | 0.005 | 0.772    |
|       | $\beta_2$ (0.1)  | 0.103  | 0.107  | 0.073 | 0.063          | 0.073 | 0.924    |
|       | $\beta_3$ (0.1)  | 0.098  | 0.098  | 0.059 | 0.059          | 0.059 | 0.951    |
|       | $c$ (1.2)        | 1.162  | 1.000  | 0.306 | –              | 0.308 | –        |

Table 11. Simulation results for the scenario GH with  $(\sigma, \kappa) = (12, 0.8)$ ,  $\beta = (0.03, 0.1, 0.1)$ ,  $n = 5000$ , and moderate mismatch  $\gamma \sim Ga(1.2, 0.02)$ . Mean of the MLEs (MMLE), median of the MLEs (mMLE), empirical standard deviation (ESD), mean (estimated) standard error, root-mean-square error (RMSE), and coverage proportions (Coverage).

**Design II:**  $\gamma \sim Ga(1.875, 0.075)$ 

| Model | Parameter        | MMLE   | mMLE   | ESD   | Mean Std Error | RMSE  | Coverage |
|-------|------------------|--------|--------|-------|----------------|-------|----------|
| M1    | $\sigma$ (12)    | 8.262  | 8.247  | 0.453 | 0.457          | 3.765 | 0.000    |
|       | $\kappa$ (0.8)   | 0.854  | 0.854  | 0.018 | 0.018          | 0.057 | 0.140    |
|       | $\beta_1$ (0.03) | 0.041  | 0.041  | 0.002 | 0.002          | 0.012 | 0.001    |
|       | $\beta_2$ (0.1)  | 0.203  | 0.202  | 0.049 | 0.050          | 0.115 | 0.465    |
|       | $\beta_3$ (0.1)  | 0.077  | 0.075  | 0.050 | 0.050          | 0.055 | 0.928    |
| M2    | $\sigma$ (12)    | 12.020 | 11.728 | 2.269 | 2.179          | 2.268 | 0.939    |
|       | $\kappa$ (0.8)   | 0.802  | 0.799  | 0.030 | 0.031          | 0.030 | 0.945    |
|       | $\beta_1$ (0.03) | 0.031  | 0.031  | 0.005 | 0.005          | 0.005 | 0.950    |
|       | $\beta_2$ (0.1)  | 0.106  | 0.110  | 0.078 | 0.078          | 0.078 | 0.941    |
|       | $\beta_3$ (0.1)  | 0.103  | 0.102  | 0.066 | 0.066          | 0.066 | 0.948    |
|       | $\gamma$ (1.875) | 1.783  | 1.801  | 0.305 | 0.298          | 0.318 | 0.970    |
| M3    | $\sigma$ (12)    | 13.365 | 12.727 | 2.994 | 3.219          | 3.289 | 0.971    |
|       | $\kappa$ (0.8)   | 0.795  | 0.794  | 0.031 | 0.033          | 0.032 | 0.961    |
|       | $\beta_1$ (0.03) | 0.028  | 0.028  | 0.006 | 0.006          | 0.006 | 0.949    |
|       | $\beta_2$ (0.1)  | 0.083  | 0.087  | 0.086 | 0.089          | 0.088 | 0.956    |
|       | $\beta_3$ (0.1)  | 0.109  | 0.109  | 0.069 | 0.072          | 0.070 | 0.960    |
|       | $b$ (0.075)      | 0.244  | 0.138  | 0.300 | 0.282          | 0.344 | 0.794    |
|       | $\mu$ (1.875)    | 2.033  | 2.017  | 0.402 | 0.438          | 0.432 | 0.917    |
| M4    | $\sigma$ (12)    | 12.448 | 11.984 | 3.286 | 2.329          | 3.315 | 0.807    |
|       | $\kappa$ (0.8)   | 0.802  | 0.798  | 0.035 | 0.029          | 0.035 | 0.836    |
|       | $\beta_1$ (0.03) | 0.030  | 0.030  | 0.007 | 0.005          | 0.007 | 0.795    |
|       | $\beta_2$ (0.1)  | 0.102  | 0.107  | 0.089 | 0.078          | 0.089 | 0.876    |
|       | $\beta_3$ (0.1)  | 0.104  | 0.102  | 0.068 | 0.067          | 0.068 | 0.947    |
|       | $c$ (1.875)      | 1.827  | 1.839  | 0.491 | –              | 0.493 | –        |

Table 12. Simulation results for the scenario GH with  $(\sigma, \kappa) = (12, 0.8)$ ,  $\beta = (0.03, 0.1, 0.1)$ ,  $n = 5000$ , and severe mismatch  $\gamma \sim Ga(1.875, 0.075)$ . Mean of the MLEs (MMLE), median of the MLEs (mMLE), empirical standard deviation (ESD), mean (estimated) standard error, root-mean-square error (RMSE), and coverage proportions (Coverage).

**Design II:**  $\gamma \sim Ga(6.5, 10)$ 

| Model | Parameter        | MMLE      | mMLE   | ESD   | Mean Std Error | RMSE  | Coverage |
|-------|------------------|-----------|--------|-------|----------------|-------|----------|
| M1    | $\sigma$ (12)    | 5.485     | 5.480  | 0.273 | 0.274          | 6.520 | 0.000    |
|       | $\kappa$ (0.8)   | 0.769     | 0.768  | 0.014 | 0.014          | 0.034 | 0.397    |
|       | $\beta_1$ (0.03) | 0.045     | 0.045  | 0.002 | 0.002          | 0.015 | 0.000    |
|       | $\beta_2$ (0.1)  | 0.203     | 0.202  | 0.044 | 0.042          | 0.111 | 0.337    |
|       | $\beta_3$ (0.1)  | 0.052     | 0.052  | 0.042 | 0.042          | 0.064 | 0.800    |
| M2    | $\sigma$ (12)    | 4.445     | 4.446  | 0.177 | 0.179          | 7.557 | 0.000    |
|       | $\kappa$ (0.8)   | 0.801     | 0.801  | 0.012 | 0.012          | 0.013 | 0.944    |
|       | $\beta_1$ (0.03) | 0.050     | 0.050  | 0.002 | 0.002          | 0.020 | 0.000    |
|       | $\beta_2$ (0.1)  | 0.248     | 0.247  | 0.036 | 0.036          | 0.152 | 0.011    |
|       | $\beta_3$ (0.1)  | 0.043     | 0.043  | 0.036 | 0.036          | 0.067 | 0.629    |
|       | $\gamma$ (6.5)   | $10^{-8}$ | 0.000  | 0.000 | 0.000          | 6.500 | 0.000    |
| M3    | $\sigma$ (12)    | 13.441    | 12.309 | 5.018 | 4.593          | 5.219 | 0.935    |
|       | $\kappa$ (0.8)   | 0.805     | 0.804  | 0.044 | 0.042          | 0.044 | 0.948    |
|       | $\beta_1$ (0.03) | 0.029     | 0.029  | 0.008 | 0.008          | 0.008 | 0.930    |
|       | $\beta_2$ (0.1)  | 0.088     | 0.095  | 0.109 | 0.108          | 0.110 | 0.944    |
|       | $\beta_3$ (0.1)  | 0.107     | 0.104  | 0.087 | 0.090          | 0.087 | 0.973    |
|       | $b$ (10)         | 10.832    | 10.209 | 2.896 | 2.627          | 3.012 | 0.939    |
|       | $\mu$ (6.5)      | 6.692     | 6.696  | 0.917 | 0.934          | 0.936 | 0.923    |
| M4    | $\sigma$ (12)    | 13.441    | 12.309 | 5.018 | 4.593          | 5.219 | 0.935    |
|       | $\kappa$ (0.8)   | 0.805     | 0.804  | 0.044 | 0.042          | 0.044 | 0.948    |
|       | $\beta_1$ (0.03) | 0.029     | 0.029  | 0.008 | 0.008          | 0.008 | 0.930    |
|       | $\beta_2$ (0.1)  | 0.088     | 0.095  | 0.109 | 0.108          | 0.110 | 0.944    |
|       | $\beta_3$ (0.1)  | 0.107     | 0.104  | 0.087 | 0.090          | 0.087 | 0.973    |
|       | $c$ (6.5)        | 6.692     | 6.696  | 0.917 | –              | 0.936 | –        |

Table 13. Simulation results for the scenario GH with  $(\sigma, \kappa) = (12, 0.8)$ ,  $\beta = (0.03, 0.1, 0.1)$ ,  $n = 5000$ , and wide mismatch  $\gamma \sim Ga(6.5, 10)$ . Mean of the MLEs (MMLE), median of the MLEs (mMLE), empirical standard deviation (ESD), mean (estimated) standard error, root-mean-square error (RMSE), and coverage proportions (Coverage).

**Design II:  $\gamma = 1$** 

| Model | Parameter        | MMLE   | mMLE   | ESD   | Mean Std Error | RMSE  | Coverage |
|-------|------------------|--------|--------|-------|----------------|-------|----------|
| M1    | $\sigma$ (12)    | 12.027 | 11.999 | 0.601 | 0.603          | 0.602 | 0.946    |
|       | $\kappa$ (0.8)   | 0.801  | 0.800  | 0.013 | 0.014          | 0.013 | 0.964    |
|       | $\beta_1$ (0.03) | 0.030  | 0.030  | 0.002 | 0.002          | 0.002 | 0.952    |
|       | $\beta_2$ (0.1)  | 0.100  | 0.101  | 0.041 | 0.041          | 0.041 | 0.952    |
|       | $\beta_3$ (0.1)  | 0.102  | 0.102  | 0.040 | 0.041          | 0.040 | 0.947    |
| M2    | $\sigma$ (12)    | 12.071 | 11.958 | 1.340 | 1.313          | 1.342 | 0.942    |
|       | $\kappa$ (0.8)   | 0.801  | 0.801  | 0.019 | 0.020          | 0.019 | 0.953    |
|       | $\beta_1$ (0.03) | 0.030  | 0.030  | 0.003 | 0.003          | 0.003 | 0.947    |
|       | $\beta_2$ (0.1)  | 0.100  | 0.103  | 0.050 | 0.049          | 0.050 | 0.940    |
|       | $\beta_3$ (0.1)  | 0.102  | 0.102  | 0.040 | 0.041          | 0.040 | 0.960    |
|       | $\gamma$ (1)     | 0.988  | 0.990  | 0.173 | 0.167          | 0.174 | 0.946    |
| M3    | $\sigma$ (12)    | 12.742 | 12.471 | 1.731 | 1.792          | 1.882 | 0.953    |
|       | $\kappa$ (0.8)   | 0.797  | 0.797  | 0.020 | 0.021          | 0.020 | 0.954    |
|       | $\beta_1$ (0.03) | 0.029  | 0.029  | 0.004 | 0.004          | 0.004 | 0.951    |
|       | $\beta_2$ (0.1)  | 0.089  | 0.090  | 0.055 | 0.054          | 0.056 | 0.949    |
|       | $\beta_3$ (0.1)  | 0.106  | 0.105  | 0.042 | 0.044          | 0.042 | 0.962    |
|       | $b$ (0)          | 0.178  | 0.026  | 0.257 | 0.225          | 0.312 | –        |
|       | $\mu$ (1)        | 1.108  | 1.093  | 0.237 | 0.248          | 0.260 | 0.906    |
| M4    | $\sigma$ (12)    | 12.244 | 12.025 | 1.379 | 0.819          | 1.400 | 0.901    |
|       | $\kappa$ (0.8)   | 0.800  | 0.800  | 0.018 | 0.015          | 0.018 | 0.940    |
|       | $\beta_1$ (0.03) | 0.030  | 0.030  | 0.003 | 0.002          | 0.003 | 0.913    |
|       | $\beta_2$ (0.1)  | 0.097  | 0.100  | 0.049 | 0.043          | 0.049 | 0.936    |
|       | $\beta_3$ (0.1)  | 0.103  | 0.102  | 0.041 | 0.041          | 0.041 | 0.950    |
|       | $c$ (1)          | 1.022  | 1.000  | 0.183 | –              | 0.184 | –        |

Table 14. Simulation results for the scenario GH with  $(\sigma, \kappa) = (12, 0.8)$ ,  $\beta = (0.03, 0.1, 0.1)$ ,  $n = 10000$ , and no mismatch  $\gamma = 1$ . Mean of the MLEs (MMLE), median of the MLEs (mMLE), empirical standard deviation (ESD), mean (estimated) standard error, root-mean-square error (RMSE), and coverage proportions (Coverage).



**Design II:**  $\gamma \sim Ga(1.2, 0.02)$ 

| Model | Parameter        | MMLE   | mMLE   | ESD   | Mean Std Error | RMSE  | Coverage |
|-------|------------------|--------|--------|-------|----------------|-------|----------|
| M1    | $\sigma$ (12)    | 10.797 | 10.790 | 0.491 | 0.503          | 1.299 | 0.372    |
|       | $\kappa$ (0.8)   | 0.816  | 0.816  | 0.014 | 0.014          | 0.021 | 0.794    |
|       | $\beta_1$ (0.03) | 0.033  | 0.033  | 0.002 | 0.002          | 0.003 | 0.541    |
|       | $\beta_2$ (0.1)  | 0.128  | 0.128  | 0.039 | 0.039          | 0.048 | 0.886    |
|       | $\beta_3$ (0.1)  | 0.094  | 0.094  | 0.038 | 0.039          | 0.039 | 0.948    |
| M2    | $\sigma$ (12)    | 12.006 | 11.888 | 1.385 | 1.352          | 1.384 | 0.951    |
|       | $\kappa$ (0.8)   | 0.802  | 0.801  | 0.020 | 0.020          | 0.020 | 0.961    |
|       | $\beta_1$ (0.03) | 0.030  | 0.030  | 0.003 | 0.003          | 0.003 | 0.947    |
|       | $\beta_2$ (0.1)  | 0.100  | 0.106  | 0.051 | 0.050          | 0.051 | 0.951    |
|       | $\beta_3$ (0.1)  | 0.101  | 0.100  | 0.042 | 0.043          | 0.042 | 0.963    |
|       | $\gamma$ (1.2)   | 1.176  | 1.184  | 0.175 | 0.176          | 0.177 | 0.960    |
| M3    | $\sigma$ (12)    | 12.735 | 12.540 | 1.796 | 1.865          | 1.940 | 0.963    |
|       | $\kappa$ (0.8)   | 0.798  | 0.798  | 0.021 | 0.022          | 0.021 | 0.965    |
|       | $\beta_1$ (0.03) | 0.029  | 0.029  | 0.004 | 0.004          | 0.004 | 0.945    |
|       | $\beta_2$ (0.1)  | 0.087  | 0.091  | 0.055 | 0.056          | 0.057 | 0.953    |
|       | $\beta_3$ (0.1)  | 0.105  | 0.104  | 0.044 | 0.045          | 0.044 | 0.963    |
|       | $b$ (0.02)       | 0.181  | 0.054  | 0.243 | 0.214          | 0.291 | 0.727    |
|       | $\mu$ (1.2)      | 1.312  | 1.297  | 0.246 | 0.263          | 0.270 | 0.925    |
| M4    | $\sigma$ (12)    | 11.862 | 11.164 | 1.780 | 0.980          | 1.784 | 0.569    |
|       | $\kappa$ (0.8)   | 0.805  | 0.807  | 0.021 | 0.017          | 0.022 | 0.847    |
|       | $\beta_1$ (0.03) | 0.031  | 0.032  | 0.004 | 0.002          | 0.004 | 0.664    |
|       | $\beta_2$ (0.1)  | 0.105  | 0.113  | 0.056 | 0.045          | 0.056 | 0.904    |
|       | $\beta_3$ (0.1)  | 0.100  | 0.099  | 0.042 | 0.042          | 0.042 | 0.952    |
|       | $c$ (1.2)        | 1.155  | 1.000  | 0.244 | –              | 0.248 | –        |

Table 15. Simulation results for the scenario GH with  $(\sigma, \kappa) = (12, 0.8)$ ,  $\beta = (0.03, 0.1, 0.1)$ ,  $n = 10000$ , and moderate mismatch  $\gamma \sim Ga(1.2, 0.02)$ . Mean of the MLEs (MMLE), median of the MLEs (mMLE), empirical standard deviation (ESD), mean (estimated) standard error, root-mean-square error (RMSE), and coverage proportions (Coverage).

**Design II:**  $\gamma \sim Ga(1.875, 0.075)$ 

| Model | Parameter        | MMLE   | mMLE   | ESD   | Mean Std Error | RMSE  | Coverage |
|-------|------------------|--------|--------|-------|----------------|-------|----------|
| M1    | $\sigma$ (12)    | 8.221  | 8.209  | 0.311 | 0.319          | 3.792 | 0.000    |
|       | $\kappa$ (0.8)   | 0.855  | 0.855  | 0.013 | 0.013          | 0.056 | 0.010    |
|       | $\beta_1$ (0.03) | 0.041  | 0.041  | 0.002 | 0.002          | 0.012 | 0.000    |
|       | $\beta_2$ (0.1)  | 0.202  | 0.202  | 0.035 | 0.035          | 0.108 | 0.178    |
|       | $\beta_3$ (0.1)  | 0.075  | 0.074  | 0.035 | 0.035          | 0.043 | 0.885    |
| M2    | $\sigma$ (12)    | 11.747 | 11.550 | 1.530 | 1.473          | 1.550 | 0.940    |
|       | $\kappa$ (0.8)   | 0.803  | 0.803  | 0.021 | 0.022          | 0.021 | 0.950    |
|       | $\beta_1$ (0.03) | 0.031  | 0.031  | 0.004 | 0.004          | 0.004 | 0.955    |
|       | $\beta_2$ (0.1)  | 0.109  | 0.111  | 0.053 | 0.054          | 0.053 | 0.947    |
|       | $\beta_3$ (0.1)  | 0.098  | 0.097  | 0.047 | 0.046          | 0.047 | 0.935    |
|       | $\gamma$ (1.875) | 1.783  | 1.793  | 0.208 | 0.209          | 0.228 | 0.973    |
| M3    | $\sigma$ (12)    | 12.719 | 12.348 | 2.040 | 2.101          | 2.162 | 0.963    |
|       | $\kappa$ (0.8)   | 0.798  | 0.798  | 0.022 | 0.023          | 0.022 | 0.959    |
|       | $\beta_1$ (0.03) | 0.029  | 0.029  | 0.004 | 0.004          | 0.004 | 0.960    |
|       | $\beta_2$ (0.1)  | 0.091  | 0.095  | 0.059 | 0.061          | 0.060 | 0.962    |
|       | $\beta_3$ (0.1)  | 0.103  | 0.102  | 0.050 | 0.049          | 0.050 | 0.941    |
|       | $b$ (0.075)      | 0.184  | 0.113  | 0.217 | 0.201          | 0.243 | 0.817    |
|       | $\mu$ (1.875)    | 1.975  | 1.956  | 0.294 | 0.312          | 0.310 | 0.926    |
| M4    | $\sigma$ (12)    | 12.171 | 11.822 | 2.076 | 1.646          | 2.082 | 0.928    |
|       | $\kappa$ (0.8)   | 0.801  | 0.801  | 0.023 | 0.022          | 0.023 | 0.934    |
|       | $\beta_1$ (0.03) | 0.030  | 0.030  | 0.004 | 0.004          | 0.004 | 0.932    |
|       | $\beta_2$ (0.1)  | 0.101  | 0.104  | 0.059 | 0.056          | 0.059 | 0.934    |
|       | $\beta_3$ (0.1)  | 0.100  | 0.098  | 0.049 | 0.047          | 0.049 | 0.935    |
|       | $c$ (1.875)      | 1.857  | 1.825  | 0.321 | –              | 0.321 | –        |

Table 16. Simulation results for the scenario GH with  $(\sigma, \kappa) = (12, 0.8)$ ,  $\beta = (0.03, 0.1, 0.1)$ ,  $n = 10000$ , and severe mismatch  $\gamma \sim Ga(1.875, 0.075)$ . Mean of the MLEs (MMLE), median of the MLEs (mMLE), empirical standard deviation (ESD), mean (estimated) standard error, root-mean-square error (RMSE), and coverage proportions (Coverage).

**Design II:**  $\gamma \sim Ga(6.5, 10)$ 

| Model | Parameter        | MMLE      | mMLE   | ESD   | Mean Std Error | RMSE  | Coverage |
|-------|------------------|-----------|--------|-------|----------------|-------|----------|
| M1    | $\sigma$ (12)    | 5.491     | 5.493  | 0.191 | 0.193          | 6.512 | 0.000    |
|       | $\kappa$ (0.8)   | 0.768     | 0.768  | 0.009 | 0.010          | 0.033 | 0.099    |
|       | $\beta_1$ (0.03) | 0.045     | 0.044  | 0.001 | 0.001          | 0.015 | 0.000    |
|       | $\beta_2$ (0.1)  | 0.203     | 0.202  | 0.030 | 0.030          | 0.107 | 0.063    |
|       | $\beta_3$ (0.1)  | 0.052     | 0.053  | 0.030 | 0.030          | 0.056 | 0.642    |
| M2    | $\sigma$ (12)    | 4.447     | 4.448  | 0.124 | 0.126          | 7.554 | 0.000    |
|       | $\kappa$ (0.8)   | 0.800     | 0.800  | 0.008 | 0.009          | 0.008 | 0.959    |
|       | $\beta_1$ (0.03) | 0.050     | 0.050  | 0.001 | 0.001          | 0.020 | 0.000    |
|       | $\beta_2$ (0.1)  | 0.247     | 0.246  | 0.025 | 0.025          | 0.149 | 0.000    |
|       | $\beta_3$ (0.1)  | 0.044     | 0.044  | 0.025 | 0.025          | 0.062 | 0.393    |
|       | $\gamma$ (6.5)   | $10^{-8}$ | 0.000  | 0.000 | 0.000          | 6.500 | 0.000    |
| M3    | $\sigma$ (12)    | 12.989    | 12.394 | 3.463 | 3.040          | 3.600 | 0.936    |
|       | $\kappa$ (0.8)   | 0.800     | 0.800  | 0.030 | 0.029          | 0.030 | 0.939    |
|       | $\beta_1$ (0.03) | 0.029     | 0.029  | 0.006 | 0.006          | 0.006 | 0.927    |
|       | $\beta_2$ (0.1)  | 0.088     | 0.097  | 0.078 | 0.076          | 0.079 | 0.945    |
|       | $\beta_3$ (0.1)  | 0.107     | 0.104  | 0.063 | 0.063          | 0.063 | 0.956    |
|       | $b$ (10)         | 10.382    | 10.011 | 1.780 | 1.662          | 1.820 | 0.947    |
|       | $\mu$ (6.5)      | 6.647     | 6.634  | 0.661 | 0.661          | 0.677 | 0.916    |
| M4    | $\sigma$ (12)    | 12.989    | 12.394 | 3.463 | 3.040          | 3.600 | 0.936    |
|       | $\kappa$ (0.8)   | 0.800     | 0.800  | 0.030 | 0.029          | 0.030 | 0.939    |
|       | $\beta_1$ (0.03) | 0.029     | 0.029  | 0.006 | 0.006          | 0.006 | 0.927    |
|       | $\beta_2$ (0.1)  | 0.088     | 0.097  | 0.078 | 0.076          | 0.079 | 0.945    |
|       | $\beta_3$ (0.1)  | 0.107     | 0.104  | 0.063 | 0.063          | 0.063 | 0.956    |
|       | $c$ (6.5)        | 6.647     | 6.634  | 0.661 | –              | 0.677 | –        |

Table 17. Simulation results for the scenario GH with  $(\sigma, \kappa) = (12, 0.8)$ ,  $\beta = (0.03, 0.1, 0.1)$ ,  $n = 10000$ , and wide mismatch  $\gamma \sim Ga(6.5, 10)$ . Mean of the MLEs (MMLE), median of the MLEs (mMLE), empirical standard deviation (ESD), mean (estimated) standard error, root-mean-square error (RMSE), and coverage proportions (Coverage).

| Scenario                              | M1    | M2    | M3    |
|---------------------------------------|-------|-------|-------|
| <i>n</i> = 5000 – Design I            |       |       |       |
| $\gamma = 1$                          | 0.701 | 0.216 | 0.083 |
| $\gamma \sim \text{Ga}(1.2, 0.02)$    | 0.708 | 0.209 | 0.083 |
| $\gamma \sim \text{Ga}(1.875, 0.075)$ | 0.598 | 0.298 | 0.104 |
| $\gamma \sim \text{Ga}(6.5, 10)$      | 0.074 | 0.023 | 0.903 |
| <i>n</i> = 5000 – Design II           |       |       |       |
| $\gamma = 1$                          | 0.815 | 0.142 | 0.043 |
| $\gamma \sim \text{Ga}(1.2, 0.02)$    | 0.703 | 0.250 | 0.047 |
| $\gamma \sim \text{Ga}(1.875, 0.075)$ | 0.165 | 0.729 | 0.106 |
| $\gamma \sim \text{Ga}(6.5, 10)$      | 0.000 | 0.000 | 1.000 |
| <i>n</i> = 10000 – Design I           |       |       |       |
| $\gamma = 1$                          | 0.741 | 0.194 | 0.065 |
| $\gamma \sim \text{Ga}(1.2, 0.02)$    | 0.724 | 0.216 | 0.060 |
| $\gamma \sim \text{Ga}(1.875, 0.075)$ | 0.482 | 0.411 | 0.104 |
| $\gamma \sim \text{Ga}(6.5, 10)$      | 0.005 | 0.000 | 0.995 |
| <i>n</i> = 10000 – Design II          |       |       |       |
| $\gamma = 1$                          | 0.799 | 0.158 | 0.043 |
| $\gamma \sim \text{Ga}(1.2, 0.02)$    | 0.620 | 0.320 | 0.060 |
| $\gamma \sim \text{Ga}(1.875, 0.075)$ | 0.034 | 0.836 | 0.130 |
| $\gamma \sim \text{Ga}(6.5, 10)$      | 0.000 | 0.000 | 1.000 |

Table 18. Proportion of selected models using AIC.

|                   | M1           | M2           | M3              |
|-------------------|--------------|--------------|-----------------|
| $b$               | –            | –            | 12.49 (2.71)    |
| $\gamma \mid \mu$ | –            | 2.59 (0.21)  | 6.88 (0.71)     |
| $\theta$          | 0.05 (0.01)  | 0.03 (0.01)  | 0.03 (0.01)     |
| $\kappa$          | 0.38 (0.01)  | 0.35 (0.01)  | 0.35 (0.01)     |
| $\alpha$          | 4.63 (0.33)  | 5.56 (0.47)  | 5.77 (0.56)     |
| Age-t             | 0.3 (0.04)   | 0.29 (0.04)  | 0.16 (0.04)     |
| Dep-t             | 0.11 (0.04)  | 0.11 (0.04)  | 0.13 (0.04)     |
| Stage 1-t         | -2.7 (0.25)  | -2.29 (0.32) | -6.07 (1)       |
| Stage 2-t         | -2.21 (0.2)  | -2.03 (0.22) | -2.87 (0.32)    |
| Stage 3-t         | -1.66 (0.11) | -1.58 (0.11) | -1.78 (0.12)    |
| CV-t              | 0.31 (0.11)  | 0.32 (0.11)  | 0.42 (0.11)     |
| COPD-t            | 0.14 (0.11)  | 0.09 (0.12)  | 0.41 (0.12)     |
| Age               | 0.27 (0.01)  | 0.23 (0.02)  | 0.16 (0.02)     |
| Dep               | 0.07 (0.01)  | 0.07 (0.01)  | 0.08 (0.01)     |
| Stage 1           | -2.85 (0.06) | -3.13 (0.09) | -3.26 (0.36)    |
| Stage 2           | -2.16 (0.06) | -2.31 (0.07) | -2.65 (0.08)    |
| Stage 3           | -1.23 (0.03) | -1.26 (0.04) | -1.36 (0.04)    |
| CV                | 0.24 (0.04)  | 0.26 (0.04)  | 0.29 (0.04)     |
| COPD              | 0.19 (0.04)  | 0.18 (0.04)  | 0.27 (0.04)     |
| AIC               | 20310.12     | 20255.2      | <b>20236.05</b> |

Table 19. Regression parameter estimates (standard errors) using models M1–M3, with their corresponding AIC using national life tables (not deprivation-specific). Note: The time- dependent effects are indicated with -t. For model M2,  $\gamma$  is estimated, while  $\mu$  is estimated for model M3. Age=Age at diagnosis (centred at 70, and divided by 10), Dep=Income Deprivation Score (centred at 0.1, and divided by 10), CV=CardioVascular comorbidity, COPD=Chronic Obstructive Pulmonary Disease, AIC=Akaike Information Criteria (best model indicated in bold font).

## Misspecified Frailty

| Model               | Parameter           | MMLE  | mMLE  | ESD   | Mean Std Error | RMSE  | Coverage |
|---------------------|---------------------|-------|-------|-------|----------------|-------|----------|
| M1                  | $\sigma$ (1.75)     | 2.010 | 1.992 | 0.394 | 0.366          | 0.472 | 0.832    |
|                     | $\kappa$ (0.6)      | 0.686 | 0.682 | 0.073 | 0.066          | 0.113 | 0.712    |
|                     | $\alpha$ (2.5)      | 2.091 | 2.042 | 0.360 | 0.325          | 0.544 | 0.692    |
|                     | $\beta_{11}$ (0.1)  | 0.101 | 0.100 | 0.017 | 0.016          | 0.017 | 0.936    |
|                     | $\beta_{12}$ (0.1)  | 0.092 | 0.076 | 0.290 | 0.274          | 0.290 | 0.952    |
|                     | $\beta_{13}$ (0.1)  | 0.149 | 0.143 | 0.285 | 0.275          | 0.289 | 0.972    |
|                     | $\beta_{21}$ (0.05) | 0.054 | 0.054 | 0.003 | 0.003          | 0.005 | 0.676    |
|                     | $\beta_{22}$ (0.2)  | 0.243 | 0.245 | 0.041 | 0.040          | 0.060 | 0.804    |
| $\beta_{23}$ (0.25) | 0.214               | 0.210 | 0.041 | 0.040 | 0.054          | 0.872 |          |
| M2                  | $\sigma$ (1.75)     | 1.612 | 1.676 | 0.605 | 0.559          | 0.620 | 0.936    |
|                     | $\kappa$ (0.6)      | 0.586 | 0.595 | 0.122 | 0.115          | 0.123 | 0.916    |
|                     | $\alpha$ (2.5)      | 3.109 | 2.536 | 2.751 | 1.371          | 2.812 | 0.940    |
|                     | $\beta_{11}$ (0.1)  | 0.101 | 0.100 | 0.018 | 0.015          | 0.018 | 0.916    |
|                     | $\beta_{12}$ (0.1)  | 0.131 | 0.119 | 0.277 | 0.261          | 0.279 | 0.952    |
|                     | $\beta_{13}$ (0.1)  | 0.087 | 0.096 | 0.264 | 0.267          | 0.264 | 0.972    |
|                     | $\beta_{21}$ (0.05) | 0.049 | 0.049 | 0.006 | 0.006          | 0.006 | 0.944    |
|                     | $\beta_{22}$ (0.2)  | 0.195 | 0.202 | 0.070 | 0.066          | 0.070 | 0.920    |
|                     | $\beta_{23}$ (0.25) | 0.253 | 0.245 | 0.061 | 0.060          | 0.060 | 0.944    |
| $\gamma$ (1.91)     | 1.887               | 1.905 | 0.885 | 0.846 | 0.883          | 0.892 |          |
| M3                  | $\sigma$ (1.75)     | 1.658 | 1.716 | 0.685 | 0.637          | 0.690 | 0.932    |
|                     | $\kappa$ (0.6)      | 0.582 | 0.594 | 0.132 | 0.122          | 0.133 | 0.920    |
|                     | $\alpha$ (2.5)      | 3.431 | 2.579 | 4.505 | 1.972          | 4.592 | 0.948    |
|                     | $\beta_{11}$ (0.1)  | 0.099 | 0.099 | 0.021 | 0.018          | 0.021 | 0.924    |
|                     | $\beta_{12}$ (0.1)  | 0.078 | 0.066 | 0.318 | 0.288          | 0.318 | 0.956    |
|                     | $\beta_{13}$ (0.1)  | 0.106 | 0.097 | 0.299 | 0.288          | 0.299 | 0.980    |
|                     | $\beta_{21}$ (0.05) | 0.047 | 0.048 | 0.008 | 0.007          | 0.008 | 0.964    |
|                     | $\beta_{22}$ (0.2)  | 0.183 | 0.189 | 0.080 | 0.074          | 0.082 | 0.928    |
|                     | $\beta_{23}$ (0.25) | 0.263 | 0.256 | 0.072 | 0.068          | 0.073 | 0.952    |
|                     | $b$ (-)             | 1.512 | 0.252 | 7.690 | 2.927          | -     | -        |
| $\mu$ (1.91)        | 2.349               | 2.314 | 1.005 | 1.041 | 1.095          | 0.84  |          |
| M4                  | $\sigma$ (1.75)     | 1.856 | 1.957 | 0.537 | 0.445          | 0.546 | 0.884    |
|                     | $\kappa$ (0.6)      | 0.645 | 0.663 | 0.110 | 0.086          | 0.119 | 0.804    |
|                     | $\alpha$ (2.5)      | 2.603 | 2.147 | 2.642 | 0.892          | 2.638 | 0.808    |
|                     | $\beta_{11}$ (0.1)  | 0.101 | 0.100 | 0.018 | 0.016          | 0.018 | 0.916    |
|                     | $\beta_{12}$ (0.1)  | 0.101 | 0.084 | 0.294 | 0.270          | 0.293 | 0.948    |
|                     | $\beta_{13}$ (0.1)  | 0.123 | 0.120 | 0.272 | 0.271          | 0.272 | 0.980    |
|                     | $\beta_{21}$ (0.05) | 0.052 | 0.053 | 0.006 | 0.004          | 0.006 | 0.776    |
|                     | $\beta_{22}$ (0.2)  | 0.223 | 0.235 | 0.062 | 0.051          | 0.066 | 0.840    |
|                     | $\beta_{23}$ (0.25) | 0.230 | 0.220 | 0.058 | 0.049          | 0.061 | 0.888    |
|                     | $c$ (1.91)          | 1.424 | 1.000 | 0.826 | -              | -     | -        |

Table 20. Simulation results for the scenario GH with  $(\sigma, \kappa, \alpha) = (1.75, 0.6, 2.5)$ ,  $\beta_1 = (0.1, 0.1, 0.1)$ ,  $\beta_2 = (0.05, 0.2, 0.25)$ ,  $n = 5000$ , and  $\gamma \sim \text{lognormal}(0.63, 0.2)$ . Mean of the MLEs (MMLE), median of the MLEs (mMLE), empirical standard deviation (ESD), mean (estimated) standard error, root-mean-square error (RMSE), and coverage proportions (Coverage). The RMSE and coverage of  $b$  are omitted as they require the true scale parameter, which is undefined in this case due to model misspecification.

Misspecified Frailty

| Model | Parameter           | MMLE    | mMLE  | ESD   | Mean Std Error | RMSE  | Coverage |
|-------|---------------------|---------|-------|-------|----------------|-------|----------|
| M1    | $\sigma$ (1.75)     | 2.037   | 2.034 | 0.247 | 0.262          | 0.378 | 0.760    |
|       | $\kappa$ (0.6)      | 0.687   | 0.685 | 0.045 | 0.047          | 0.098 | 0.524    |
|       | $\alpha$ (2.5)      | 2.042   | 2.031 | 0.209 | 0.220          | 0.503 | 0.512    |
|       | $\beta_{11}$ (0.1)  | 0.100   | 0.099 | 0.011 | 0.011          | 0.011 | 0.948    |
|       | $\beta_{12}$ (0.1)  | 0.092   | 0.096 | 0.196 | 0.189          | 0.196 | 0.956    |
|       | $\beta_{13}$ (0.1)  | 0.172   | 0.183 | 0.188 | 0.190          | 0.200 | 0.948    |
|       | $\beta_{21}$ (0.05) | 0.055   | 0.055 | 0.002 | 0.002          | 0.005 | 0.400    |
|       | $\beta_{22}$ (0.2)  | 0.241   | 0.243 | 0.029 | 0.028          | 0.050 | 0.676    |
|       | $\beta_{23}$ (0.25) | 0.219   | 0.218 | 0.027 | 0.028          | 0.042 | 0.800    |
| M2    | $\sigma$ (1.75)     | 1.614   | 1.622 | 0.422 | 0.426          | 0.442 | 0.960    |
|       | $\kappa$ (0.6)      | 0.579   | 0.575 | 0.086 | 0.083          | 0.088 | 0.960    |
|       | $\alpha$ (2.5)      | 2.810   | 2.645 | 0.917 | 0.717          | 0.966 | 0.960    |
|       | $\beta_{11}$ (0.1)  | 0.100   | 0.100 | 0.010 | 0.010          | 0.010 | 0.944    |
|       | $\beta_{12}$ (0.1)  | 0.111   | 0.123 | 0.183 | 0.180          | 0.183 | 0.964    |
|       | $\beta_{13}$ (0.1)  | 0.100   | 0.100 | 0.183 | 0.186          | 0.183 | 0.968    |
|       | $\beta_{21}$ (0.05) | 0.050   | 0.050 | 0.004 | 0.004          | 0.004 | 0.960    |
|       | $\beta_{22}$ (0.2)  | 0.191   | 0.194 | 0.047 | 0.047          | 0.048 | 0.940    |
|       | $\beta_{23}$ (0.25) | 0.258   | 0.255 | 0.040 | 0.043          | 0.041 | 0.960    |
|       | $\gamma$ (1.91)     | 1.977   | 2.053 | 0.612 | 0.610          | 0.615 | 0.904    |
| M3    | $\sigma$ (1.75)     | 1.633   | 1.644 | 0.472 | 0.473          | 0.486 | 0.952    |
|       | $\kappa$ (0.6)      | 0.574   | 0.566 | 0.091 | 0.088          | 0.095 | 0.948    |
|       | $\alpha$ (2.5)      | 2.894   | 2.738 | 0.990 | 0.791          | 1.063 | 0.952    |
|       | $\beta_{11}$ (0.1)  | 0.098   | 0.098 | 0.012 | 0.011          | 0.012 | 0.940    |
|       | $\beta_{12}$ (0.1)  | 0.080   | 0.090 | 0.194 | 0.196          | 0.195 | 0.960    |
|       | $\beta_{13}$ (0.1)  | 0.116   | 0.109 | 0.195 | 0.196          | 0.196 | 0.960    |
|       | $\beta_{21}$ (0.05) | 0.048   | 0.048 | 0.005 | 0.005          | 0.005 | 0.972    |
|       | $\beta_{22}$ (0.2)  | 0.182   | 0.182 | 0.051 | 0.051          | 0.054 | 0.940    |
|       | $\beta_{23}$ (0.25) | 0.267   | 0.267 | 0.045 | 0.047          | 0.048 | 0.940    |
|       |                     | $b$ (-) | 0.712 | 0.223 | 2.632          | 0.865 | -        |
|       | $\mu$ (1.91)        | 2.320   | 2.358 | 0.685 | 0.736          | 0.797 | 0.844    |
| M4    | $\sigma$ (1.75)     | 1.772   | 1.844 | 0.431 | 0.370          | 0.430 | 0.868    |
|       | $\kappa$ (0.6)      | 0.618   | 0.632 | 0.092 | 0.069          | 0.093 | 0.776    |
|       | $\alpha$ (2.5)      | 2.548   | 2.321 | 0.926 | 0.546          | 0.926 | 0.772    |
|       | $\beta_{11}$ (0.1)  | 0.100   | 0.099 | 0.011 | 0.011          | 0.011 | 0.948    |
|       | $\beta_{12}$ (0.1)  | 0.098   | 0.100 | 0.191 | 0.186          | 0.191 | 0.964    |
|       | $\beta_{13}$ (0.1)  | 0.129   | 0.115 | 0.192 | 0.189          | 0.194 | 0.944    |
|       | $\beta_{21}$ (0.05) | 0.051   | 0.052 | 0.004 | 0.003          | 0.005 | 0.724    |
|       | $\beta_{22}$ (0.2)  | 0.208   | 0.217 | 0.051 | 0.040          | 0.051 | 0.820    |
|       | $\beta_{23}$ (0.25) | 0.244   | 0.240 | 0.041 | 0.037          | 0.041 | 0.884    |
|       | $c$ (1.91)          | 1.668   | 1.524 | 0.749 | -              | -     | -        |

Table 21. Simulation results for the scenario GH with  $(\sigma, \kappa, \alpha) = (1.75, 0.6, 2.5)$ ,  $\beta_1 = (0.1, 0.1, 0.1)$ ,  $\beta_2 = (0.05, 0.2, 0.25)$ ,  $n = 10000$ , and  $\gamma \sim \text{lognormal}(0.63, 0.2)$ . Mean of the MLEs (MMLE), median of the MLEs (mMLE), empirical standard deviation (ESD), mean (estimated) standard error, root-mean-square error (RMSE), and coverage proportions (Coverage). The RMSE and coverage of  $b$  are omitted as they require the true scale parameter, which is undefined in this case due to model misspecification.
